# Supplementary material for: Supramolecular gels for the remediation of reactive organophosphorus compounds
Source: Royal Society of Chemistry journal article supplement (doi:10.1039/c4ra07712a), 2014-01-01
Supplement: c4ra07712a1.pdf [file c4ra07712a1.pdf]

# Supramolecular gels for the remediation of reactive organophosphorus compounds

Jennifer R. Hiscock,<sup>a</sup> Isabelle L. Kirby<sup>a</sup>, Julie Herniman<sup>a</sup>, G. John Langley<sup>a</sup>, Alistair J. Clark<sup>a</sup>, and Philip A. Gale<sup>\*a</sup>

<sup>a</sup> School of Chemistry, University of Southampton, Southampton, UK SO17 1BJ. E-mail: [philip.gale@soton.ac.uk](mailto:philip.gale@soton.ac.uk); Fax: +44 (0)23 8059 6805; Tel: +44 (0)23 8059 3322.

## Electronic Supplementary Information

### Experimental

**General remarks:** All reactions were performed under slight positive pressure of nitrogen using oven-dried glassware. All solvents and starting materials were purchased from chemical stores where available. Commercial grade reagents have been used without further purification. <sup>1</sup>H NMR (500 MHz) and <sup>13</sup>C{<sup>1</sup>H} NMR (125 MHz) were determined on a Bruker AV III HD 500 spectrometer, <sup>1</sup>H NMR (400 MHz), <sup>31</sup>P{<sup>1</sup>H} NMR (162 MHz) and <sup>13</sup>C{<sup>1</sup>H} NMR (100 MHz) were determined on a Bruker AV II 400 or AV III HD 400 spectrometer with the chemical shifts reported in parts per million (ppm), calibrated to the centre of the solvent peak set. Some <sup>13</sup>C peaks are missing due to overlapping signals. The following abbreviations are used for spin multiplicity: s = singlet, d = doublet, t = triplet, m = multiplet, br = broad. Infrared (IR) spectra were recorded on a Matterson Satellite (ATR), and reported in wavenumbers (cm<sup>-1</sup>). Low resolution mass spectra were recorded on a Waters Acquity UHPLC-MS system. High resolution mass spectra were recorded on a Bruker Maxis ESI-TOF system by the mass spectrometry service at the University of Southampton. Melting points were recorded in open capillaries on a Gallenkamp melting point apparatus and are uncorrected. SEM images were collected on a FEI XL30 ESEM in low pressure mode. Samples were prepared on aluminium stubs using self adhesive carbon tabs. Details of individual image collection can be seen in Figure S20.

**Compound 2** Undecanoic acid (0.50 g, 2.68 mM) was heated at reflux with carbonyldiimidazole (CDI) (0.46 g, 2.82 mM) for 2 hrs in chloroform (40 mL). (1*R*,2*R*)-(-)-1,2-Cyclohexanediamine (0.15 g, 1.34 mM) was then added to the solution which was heated at reflux overnight under. The mixture was then washed with water (2 x 100 mL) and then dried with MgSO<sub>4</sub>. The organic phase was then taken to dryness and dissolved in the minimum amount of hot methanol. A white solid formed as the solution cooled, this was isolated by filtration and washed with cold methanol (20 ml). Yield: 57 % (0.34 g, 0.79 mM); mp: 172 °C; <sup>1</sup>H NMR (400 MHz, CDCl<sub>3</sub>): δ: 0.87 (t, J = 6.08 Hz, 6H), 1.25 (br s, 32H), 1.56 (br s, 4H), 1.74 (d, J = 8.16 Hz, 2H), 2.02 (d, J = 12.08 Hz, 2H), 2.10 (dd, J<sub>1</sub> = 11.60 Hz, J<sub>2</sub> = 6.96 Hz, 4H), 3.65 (br s, 2H), 5.93 (d, J = 4.40 Hz, 2H, amide NH); <sup>13</sup>C NMR (100 MHz, CDCl<sub>3</sub>): δ: 14.2 (CH<sub>3</sub>), 22.8 (CH<sub>2</sub>), 24.9 (CH<sub>2</sub>), 26.0 (CH<sub>2</sub>), 29.5 (CH<sub>2</sub>), 29.5 (CH<sub>2</sub>), 29.5 (CH<sub>2</sub>), 29.7 (CH<sub>2</sub>), 29.7 (CH<sub>2</sub>), 32.0 (CH<sub>2</sub>), 32.5 (CH<sub>2</sub>), 37.1 (CH<sub>2</sub>), 53.8 (CH), 174.0 (CO); IR (film): ν = 3270 (amide NH stretching), 3080 (amide NH stretching), 1640 (amide CO stretching), 1540 (amide CO stretching); LRMS (ESI<sup>+</sup>): m/z: 451 [M+H]<sup>+</sup>; HRMS (ESI<sup>+</sup>) for C<sub>28</sub>H<sub>54</sub>N<sub>2</sub>NaO<sub>2</sub>: m/z: act: [M+Na]<sup>+</sup> 478.4068, cal: [M+Na]<sup>+</sup> 473.4078, Δδ (ppm) = 2.0.

**Compound 1** was synthesised by the same general method given for compound **2**. Decanoic acid (0.50 g, 2.90 mM), CDI (0.49, 3.00 mM), (1*R*,2*R*)-(-)-1,2-Cyclohexanediamine (0.17 g, 1.45 mM). Yield: 38 % (0.24 g, 0.56 mM). <sup>1</sup>H NMR spectrum was found to match that previously published by Sato and co-workers.<sup>1</sup>

**Compound 3** was synthesised by the same general method given for compound **2**. Dodecanoic acid (0.50 g, 2.50 mM), CDI (0.42, 2.60 mM), (1*R*,2*R*)-(-)-1,2-Cyclohexanediamine (0.14 g, 1.25 mM). Yield: 58 % (0.35 g, 0.73 mM). <sup>1</sup>H NMR spectrum was found to match that previously published by Esch and co-workers.<sup>2</sup>

**Compound 4** was synthesised by the same general method given for compound **2**. Tridecanoic acid (0.50 g, 2.33 mM), CDI (0.40, 2.45 mM), (1*R*,2*R*)-(-)-1,2-Cyclohexanediamine (0.13 g, 1.17 mM). Yield: 79 % (0.47 g, 0.92 mM); mp: 168 °C; <sup>1</sup>H NMR (400 MHz, CDCl<sub>3</sub>): δ: 0.88 (t, J = 6.00 Hz, 6H), 1.25 (br s, 40H), 1.57 (br s, 4H), 1.74 (d, J = 7.96 Hz, 2H), 2.02 (d, J = 12.24 Hz, 2H), 2.11 (dd, J<sub>1</sub> = 11.36 Hz, J<sub>2</sub> = 7.08 Hz, 4H), 3.65 (br s, 2H), 5.90 (br s, 2H, amide NH); <sup>13</sup>C NMR (100 MHz, CDCl<sub>3</sub>): δ: 14.6 (CH<sub>3</sub>), 23.1 (CH<sub>2</sub>), 25.2 (CH<sub>2</sub>), 26.3 (CH<sub>2</sub>), 29.8 (CH<sub>2</sub>), 29.8 (CH<sub>2</sub>), 29.9 (CH<sub>2</sub>), 30.0 (CH<sub>2</sub>), 30.1 (CH<sub>2</sub>), 30.1 (CH<sub>2</sub>), 32.4 (CH<sub>2</sub>), 37.4 (CH<sub>2</sub>), 54.1 (CH), 174.4 (CO); IR (film): ν = 3270 (amide NH stretching), 3080 (amide NH stretching), 1640 (amide CO stretching), 1540 (amide CO stretching); LRMS (ESI<sup>+</sup>): m/z: 507 [M+H]<sup>+</sup>; HRMS (ESI<sup>+</sup>) for C<sub>32</sub>H<sub>63</sub>N<sub>2</sub>O<sub>2</sub>: m/z: act: [M+H]<sup>+</sup> 507.4878, cal: [M+H]<sup>+</sup> 507.4884, Δδ (ppm) = 1.3. Although previously published by Kimura, Shirai and co-workers<sup>3</sup> full characterisation of this compound was performed.

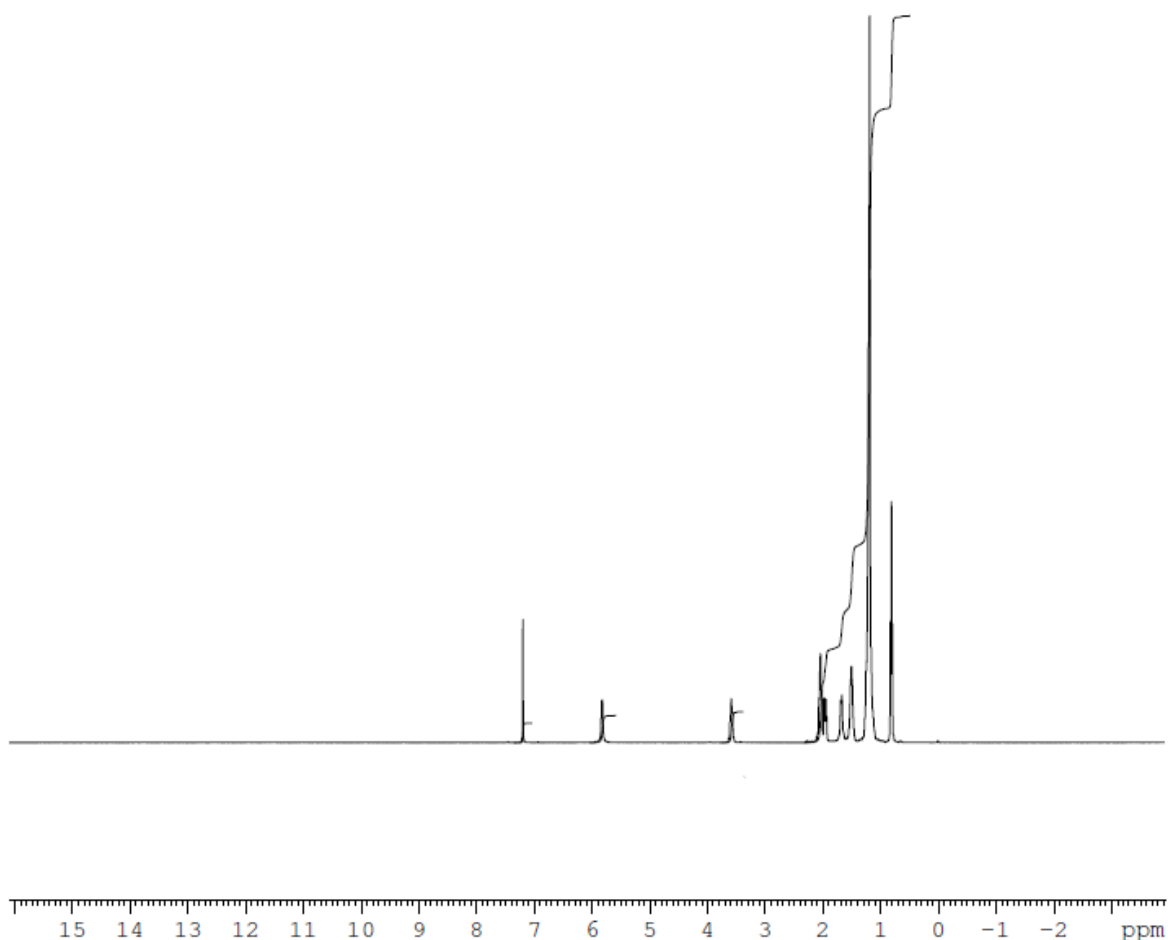

**Figure S1** <sup>1</sup>H NMR spectrum of compound **1** in CDCl<sub>3</sub>.

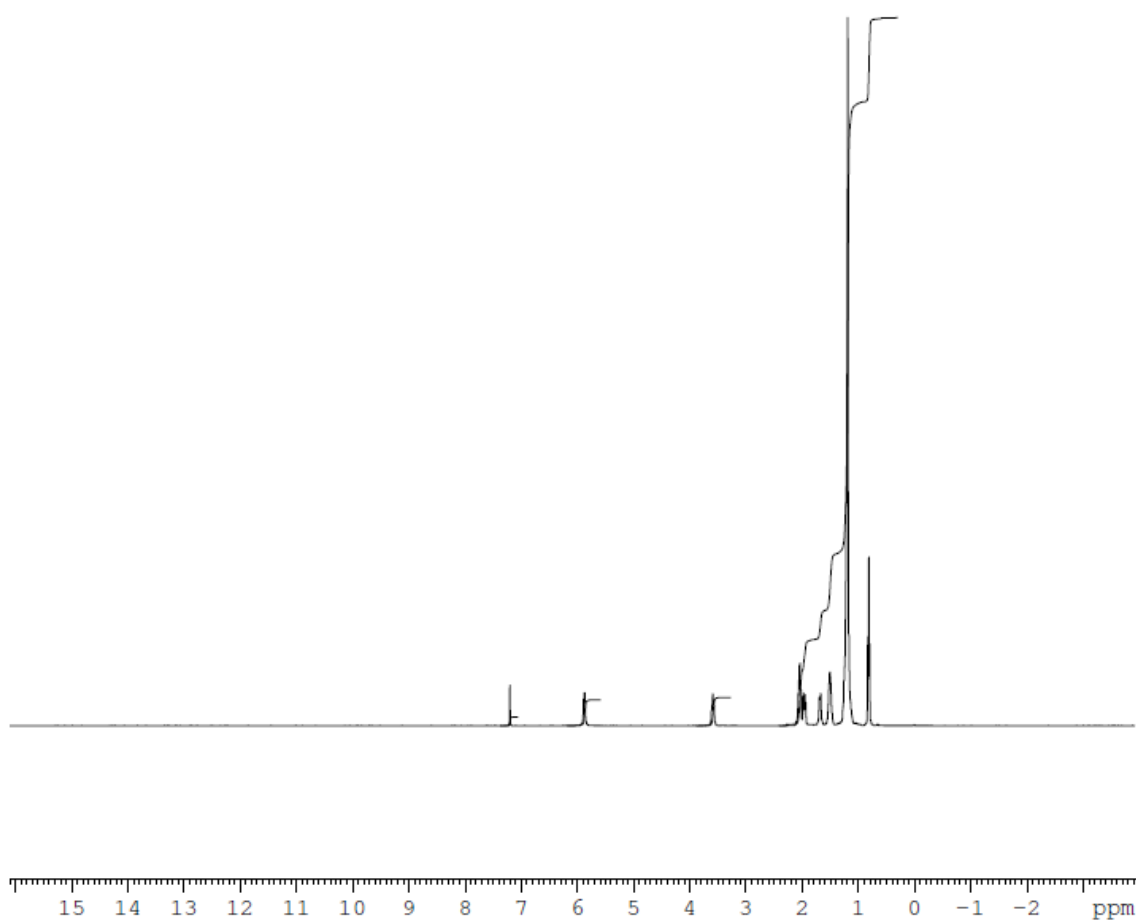

**Figure S2** <sup>1</sup>H NMR spectrum of compound **2** in CDCl<sub>3</sub>.

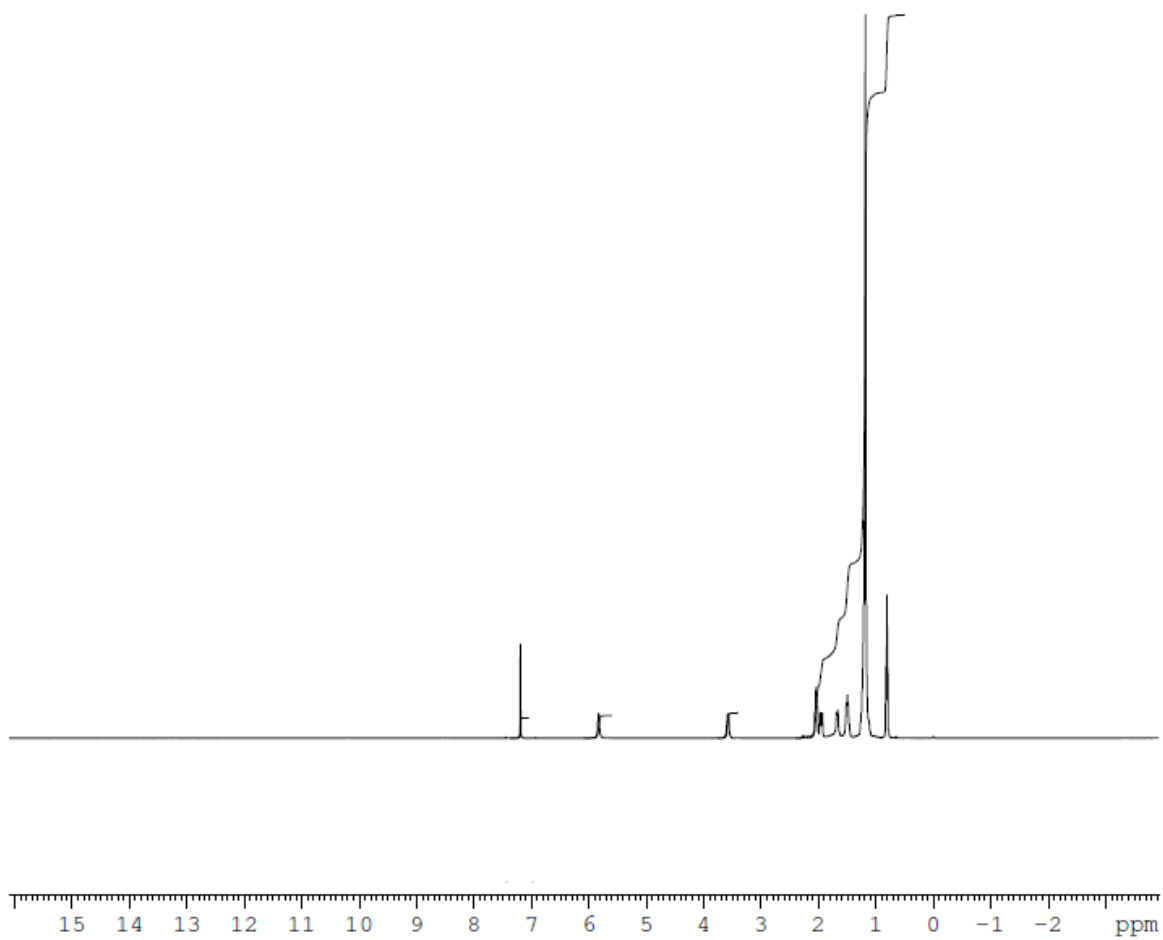

**Figure S3**  $^1\text{H}$  NMR spectrum of compound **3** in  $\text{CDCl}_3$ .

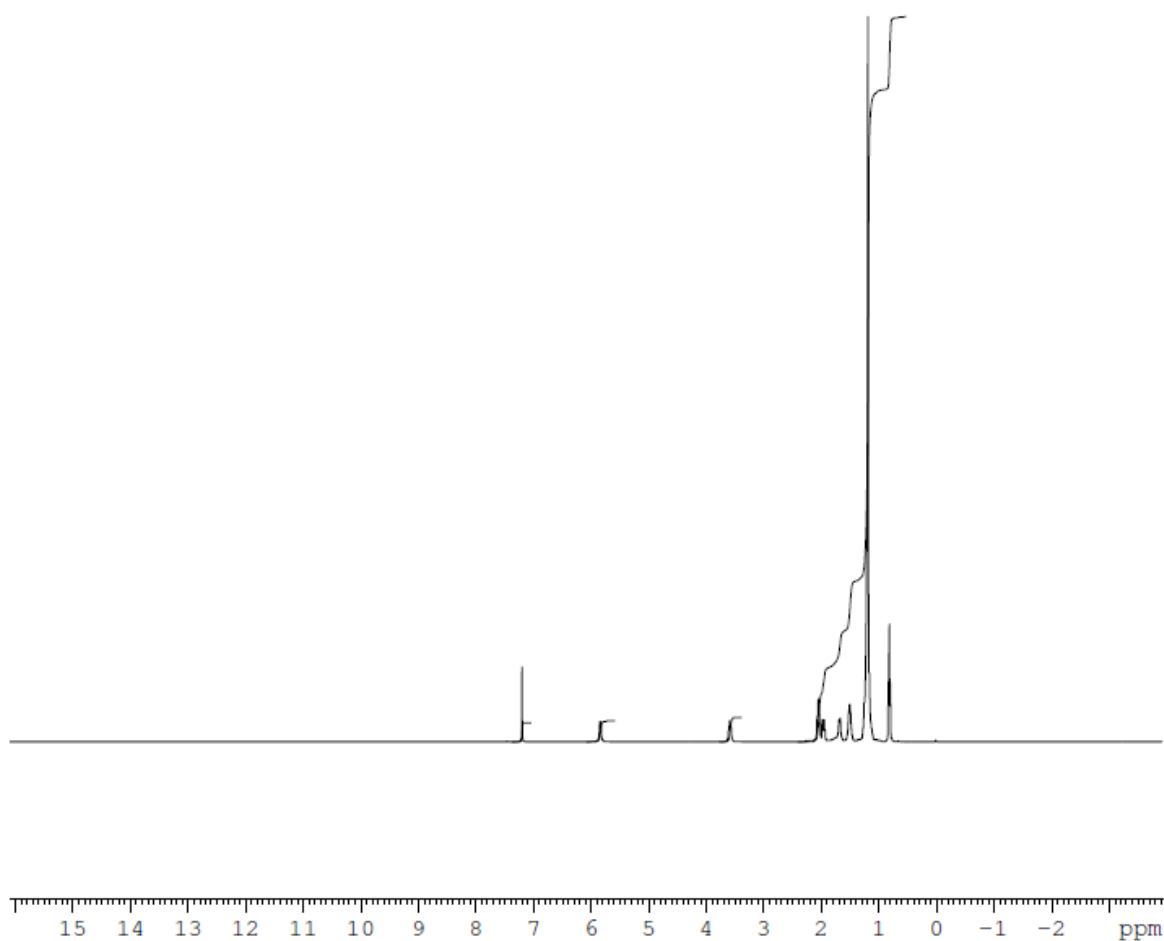

**Figure S4**  $^1\text{H}$  NMR spectrum of compound **4** in  $\text{CDCl}_3$ .

**Addition of DCP/HCl/EP to warmed gelation solutions of compounds 1-4 in pyridine.** The pyridine gels were prepared using a standard method. The gelator was heated in a sealed vial with pyridine until all the solid had dissolved. The gel solution was then allowed to cool to 30-40 °C, at this point just before gelation occurs the DCP/HCl/EP was added to the solution. The gels were then cooled to room temperature and inverted to check to see if a gel had formed. The results of these experiments are shown in Tables S10-S15.

**Table S1** Amount of gelator, compound **1** (mmol) and added phosphonate (mmol).

| Gelator     | Amount of gelator in 1 mL of gel (mmol) |       |          |       |          |        |          |        |          |  |
|-------------|-----------------------------------------|-------|----------|-------|----------|--------|----------|--------|----------|--|
|             | 25 mg                                   | 20 mg | 15 mg    | 10 mg | 5.0 mg   | 4.0 mg | 3.0 mg   | 2.5 mg | 2.0 mg   |  |
| <b>1</b>    | 0.059                                   | 0.047 | 0.035    | 0.024 | 0.012    | 0.009  | 0.007    | 0.006  | 0.005    |  |
| <b>2</b>    | 0.055                                   | 0.044 | 0.033    | 0.022 | 0.011    | 0.009  | 0.007    | 0.006  | 0.004    |  |
| <b>3</b>    | 0.052                                   | 0.042 | 0.031    | 0.021 | 0.010    | 0.008  | 0.006    | 0.005  | 0.004    |  |
| <b>4</b>    | 0.049                                   | 0.039 | 0.029    | 0.020 | 0.010    | 0.008  | 0.006    | 0.005  | 0.004    |  |
| Phosphonate | Amount of phosphonate added (mmol)      |       |          |       |          |        |          |        |          |  |
|             | 1.000 mL                                |       | 0.100 mL |       | 0.050 mL |        | 0.010 mL |        | 0.001 mL |  |
| DCP         | 6.955                                   |       | 0.695    |       | 0.348    |        | 0.070    |        | 0.007    |  |
| DMMP        | 9.228                                   |       | 0.923    |       | 0.461    |        | 0.092    |        | 0.009    |  |

**Table S2:** Formation of gels with compound 1, all experiments were performed with 1 mL of the solvent stated.

| Concentration of gelator (mg/mL) | Solvent  |             |
|----------------------------------|----------|-------------|
|                                  | Pyridine | TEA         |
| 25.0                             | No gel   | NA          |
| 20.0                             | No gel   | Gel         |
| 15.0                             | NA       | NA          |
| 12.0                             | NA       | NA          |
| 10.0                             | NA       | Gel         |
| 9.0                              | NA       | NA          |
| 8.0                              | NA       | NA          |
| 7.0                              | NA       | NA          |
| 6.0                              | NA       | NA          |
| 5.0                              | NA       | Gel         |
| 4.0                              | NA       | Gel         |
| 3.0                              | NA       | Partial gel |
| 2.5                              | NA       | Partial gel |
| 2.0                              | NA       | NA          |
| 1.0                              | NA       | NA          |

**Table S3:** Formation of gels with compound 2, all experiments were performed with 1 mL of the solvent stated.

| Concentration of gelator (mg/mL) | Solvent  |             |
|----------------------------------|----------|-------------|
|                                  | Pyridine | TEA         |
| 25.0                             | No gel   | NA          |
| 20.0                             | No gel   | Gel         |
| 15.0                             | NA       | NA          |
| 12.0                             | NA       | NA          |
| 10.0                             | NA       | Gel         |
| 9.0                              | NA       | NA          |
| 8.0                              | NA       | NA          |
| 7.0                              | NA       | NA          |
| 6.0                              | NA       | NA          |
| 5.0                              | NA       | Gel         |
| 4.0                              | NA       | Partial gel |
| 3.0                              | NA       | Partial gel |
| 2.5                              | NA       | Partial gel |
| 2.0                              | NA       | NA          |
| 1.0                              | NA       | NA          |

**Table S4:** Formation of gels with compound **3**, all experiments were performed with 1 mL of the solvent stated.

| Concentration of gelator (mg/mL) | Solvent     |             |
|----------------------------------|-------------|-------------|
|                                  | Pyridine    | TEA         |
| 25.0                             | Gel         | NA          |
| 20.0                             | Gel         | Gel         |
| 15.0                             | Gel         | Gel         |
| 14.0                             | Gel         | NA          |
| 13.0                             | Gel         | NA          |
| 12.0                             | Partial gel | NA          |
| 11.0                             | Partial gel | NA          |
| 10.0                             | No gel      | Gel         |
| 9.0                              | NA          | NA          |
| 8.0                              | NA          | Gel         |
| 7.0                              | NA          | NA          |
| 6.0                              | NA          | Gel         |
| 5.0                              | NA          | NA          |
| 4.0                              | NA          | Gel         |
| 3.0                              | NA          | Gel         |
| 2.5                              | NA          | NA          |
| 2.0                              | NA          | Partial gel |
| 1.0                              | NA          | NA          |

**Table S5:** Formation of gels with compound **4**, all experiments were performed with 1 mL of the solvent stated.

| Concentration of gelator (mg/mL) | Solvent     |             |
|----------------------------------|-------------|-------------|
|                                  | Pyridine    | TEA         |
| 25.0                             | NA          | NA          |
| 20.0                             | Gel         | Gel         |
| 15.0                             | NA          | NA          |
| 12.0                             | NA          | NA          |
| 10.0                             | Gel         | Gel         |
| 9.0                              | Gel         | NA          |
| 8.0                              | Gel         | NA          |
| 7.0                              | Gel         | NA          |
| 6.0                              | Partial gel | NA          |
| 5.0                              | No gel      | Gel         |
| 4.0                              | NA          | Gel         |
| 3.0                              | NA          | Partial gel |
| 2.5                              | NA          | Partial gel |
| 2.0                              | NA          | NA          |
| 1.0                              | NA          | NA          |

**Table S6:** Formation of gels with compound **1**, all experiments were performed with 1 mL of the solvent stated.

| Concentration of gelator (mg/mL) | Solvent     |        |
|----------------------------------|-------------|--------|
|                                  | DMMP        | DCP    |
| 40.0                             | NA          | No Gel |
| 20.0                             | Gel         | NA     |
| 10.0                             | Gel         | NA     |
| 5.0                              | Gel         | NA     |
| 4.0                              | Partial Gel | NA     |
| 3.0                              | Partial Gel | NA     |
| 2.5                              | No Gel      | NA     |

**Table S7:** Formation of gels with compound **2**, all experiments were performed with 1 mL of the solvent stated.

| Concentration of gelator (mg/mL) | Solvent     |        |
|----------------------------------|-------------|--------|
|                                  | DMMP        | DCP    |
| 40.0                             | NA          | No Gel |
| 20.0                             | Gel         | NA     |
| 10.0                             | Gel         | NA     |
| 5.0                              | Gel         | NA     |
| 4.0                              | Gel         | NA     |
| 3.0                              | Gel         | NA     |
| 2.5                              | Partial Gel | NA     |

**Table S8:** Formation of gels with compound **3**, all experiments were performed with 1 mL of the solvent stated.

| Concentration of gelator (mg/mL) | Solvent     |                               |
|----------------------------------|-------------|-------------------------------|
|                                  | DMMP        | DCP                           |
| 40.0                             | NA          | Partial Gel/<br>Precipitation |
| 20.0                             | Gel         | Partial Gel                   |
| 10.0                             | Gel         | NA                            |
| 5.0                              | Gel         | NA                            |
| 4.0                              | Gel         | NA                            |
| 3.0                              | Gel         | NA                            |
| 2.5                              | Partial Gel | NA                            |

**Table S9:** Formation of gels with compound **4**, all experiments were performed with 1 mL of the solvent stated.

| Concentration of gelator (mg/mL) | Solvent     |        |
|----------------------------------|-------------|--------|
|                                  | DMMP        | DCP    |
| 40.0                             | NA          | No Gel |
| 20.0                             | Gel         | NA     |
| 10.0                             | Gel         | NA     |
| 5.0                              | Gel         | NA     |
| 4.0                              | Gel         | NA     |
| 3.0                              | Gel         | NA     |
| 2.5                              | Partial Gel | NA     |



**Table S10:** Reactions containing compounds **2/3** and/or pyridine with the addition of various additives, as well as the reactions of the solvents TEA and pyridine with the addition of various additives. Reactions were carried out over a time frame > 12 hrs.

| Solvent  | Gelator  | Conc. (mg/mL) | Additive (mL) | Response                                                                                    |
|----------|----------|---------------|---------------|---------------------------------------------------------------------------------------------|
| TEA      | NA       |               | HCl (0.1)     | White solid produced (HCl salt)                                                             |
| TEA      | NA       |               | EP (0.1)      | Immiscible                                                                                  |
| TEA      | NA       |               | DCP (0.1)     | Solid/gel produced, yellow in colour, no solution, passed inversion test                    |
| Pyridine | NA       |               | HCl (0.1)     | No visible changes                                                                          |
| Pyridine | NA       |               | EP (0.1)      | No visible changes                                                                          |
| Pyridine | NA       |               | DCP (0.1)     | Very slight yellowing of the solution                                                       |
| Pyridine | <b>3</b> | 20            | EP (0.1)      | Colourless gel formed with the incorporation in EP into the gel. No change noted over time. |
| Pyridine | <b>4</b> | 20            | EP (0.1)      | Colourless gel formed with the incorporation in EP into the gel. No change noted over time. |
| NA       | <b>2</b> | 40            | DCP (1.0)     | Slight yellowing of the solution when left at room temperature overnight                    |
| NA       | <b>3</b> | 40            | DCP (1.0)     | Slight yellowing of the solution when left at room temperature overnight                    |

**Table S11:** DCP (0.1 mL) addition to a warmed solution of compounds **1**, **2**, **3** and **4** (20 mg) in pyridine (1 mL). Time (T=0) is considered to be the point at which the DCP is added to the warmed pyridine/gelator solution. All experiments were run for a minimum of 18 hrs. At the end of the experiment each gel was found to have degraded into a solution and all samples were red in colour.

| Compound/<br>Gelator | DCP<br>(mL) | Time<br>(mins) | Observation                                                         |
|----------------------|-------------|----------------|---------------------------------------------------------------------|
| <b>1</b>             | 0.1         | < 1            | Light pink solution                                                 |
| <b>1</b>             | 0.1         | 5              | Light pink solution                                                 |
| <b>1</b>             | 0.1         | 20             | Light pink solution                                                 |
| <b>2</b>             | 0.1         | <1             | Light yellow solution                                               |
| <b>2</b>             | 0.1         | 5              | Light yellow solution                                               |
| <b>2</b>             | 0.1         | 20             | Light yellow solution                                               |
| <b>3</b>             | 0.1         | 0              | DCP added to warmed solution                                        |
| <b>3</b>             | 0.1         | 3              | Colourless gel formed                                               |
| <b>3</b>             | 0.1         | 30             | Yellow gel formed                                                   |
| <b>3</b>             | 0.1         | 60             | Orange solution most of the gel dissolved                           |
| <b>3</b>             | 0.1         | 90             | Darkening of orange solution – no gel                               |
| <b>3</b>             | 0.1         | 1080           | Dark red solution                                                   |
| <b>4</b>             | 0.1         | < 1            | Almost immediate colourless, clear gel formation                    |
| <b>4</b>             | 0.1         | 5              | Slight clouding of gel                                              |
| <b>4</b>             | 0.1         | 20             | Slight yellowing of gel                                             |
| <b>4</b>             | 0.1         | 30             | Increasing strength of colour                                       |
| <b>4</b>             | 0.1         | 60             | Increasing strength of colour                                       |
| <b>4</b>             | 0.2         | < 1            | Almost immediate colourless, slightly opaque gel formation          |
| <b>4</b>             | 0.2         | 5              | Slight yellowing of gel                                             |
| <b>4</b>             | 0.2         | 20             | Increasing strength of colour                                       |
| <b>4</b>             | 0.2         | 30             | Increasing strength of colour                                       |
| <b>4</b>             | 0.2         | 60             | Orange gel some degradation into an orange solution                 |
| <b>4</b>             | 0.3         | < 1            | Immediate clear, colourless gel formation upon DCP addition         |
| <b>4</b>             | 0.3         | 5              | Slight yellowing of gel                                             |
| <b>4</b>             | 0.3         | 20             | Increasing strength of colour                                       |
| <b>4</b>             | 0.3         | 30             | Increasing strength of colour, some gel degradation                 |
| <b>4</b>             | 0.3         | 60             | Orange gel approx. 2/3 degradation into an orange solution          |
| <b>4</b>             | 0.4         | < 1            | Immediate clear, colourless gel formation upon DCP addition         |
| <b>4</b>             | 0.4         | 5              | Slight yellowing of gel                                             |
| <b>4</b>             | 0.4         | 20             | Increasing strength of colour                                       |
| <b>4</b>             | 0.4         | 30             | Increasing strength of colour, some gel degradation                 |
| <b>4</b>             | 0.4         | 60             | Most of the gel degraded into an orange solution, orange gel        |
| <b>4</b>             | 0.5         | < 1            | Immediate clear, colourless gel formation upon DCP addition         |
| <b>4</b>             | 0.5         | 5              | Slight yellowing of gel                                             |
| <b>4</b>             | 0.5         | 20             | Increasing strength of colour                                       |
| <b>4</b>             | 0.5         | 30             | Increasing strength of colour, some gel degradation                 |
| <b>4</b>             | 0.5         | 60             | Complete degradation of orange gel into orange solution             |
| <b>4</b>             | 1.0         | < 1            | Immediate clear, colourless gel formation upon DCP addition         |
| <b>4</b>             | 1.0         | 5              | Slight yellowing of gel                                             |
| <b>4</b>             | 1.0         | 20             | Partial gel only, some yellowing of solution and partial gel        |
| <b>4</b>             | 1.0         | 30             | Most of the gel degraded into an orange solution, orange gel        |
| <b>4</b>             | 1.0         | 60             | Complete degradation of orange gel into orange solution, some solid |

**Table S12:** Conc. HCl addition to a warmed solution of compound **1** in pyridine (1 mL). Time (T=0) is considered to be the point at which the HCl is added to the warmed pyridine/gelator solution.

| Compound/<br>Gelator | Amount<br>(mg/mL) | HCl<br>(mL) | Time<br>(mins) | Observation        |
|----------------------|-------------------|-------------|----------------|--------------------|
| <b>1</b>             | 20                | 0.05        | 5              | Yellow gel         |
| <b>1</b>             | 20                | 0.1         | 5              | Yellow solution    |
| <b>1</b>             | 20                | 0.05        | 30             | Yellow gel         |
| <b>1</b>             | 20                | 0.1         | 30             | Partial yellow gel |
| <b>1</b>             | 20                | 0.05        | 60             | Yellow gel         |
| <b>1</b>             | 20                | 0.1         | 60             | Yellow gel         |
| <b>1</b>             | 20                | 0.05        | 1360           | Yellow gel         |
| <b>1</b>             | 20                | 0.1         | 1360           | Yellow gel         |

**Table S13:** Conc. HCl addition to a warmed solution of compound **2** in pyridine (1 mL). Time (T=0) is considered to be the point at which the HCl is added to the warmed pyridine/gelator solution.

| Compound/<br>Gelator | Amount<br>(mg/mL) | HCl<br>(mL) | Time<br>(mins) | Observation |
|----------------------|-------------------|-------------|----------------|-------------|
| <b>2</b>             | 20                | 0.05        | 5              | Yellow gel  |
| <b>2</b>             | 20                | 0.1         | 5              | Yellow gel  |
| <b>2</b>             | 20                | 0.05        | 1040           | Yellow gel  |
| <b>2</b>             | 20                | 0.1         | 1040           | Yellow gel  |

**Table S14:** Conc. HCl addition to a warmed solution of compound **3** in pyridine (1 mL). Time (T=0) is considered to be the point at which the HCl is added to the warmed pyridine/gelator solution.

| Compound/<br>Gelator | Amount<br>(mg/mL) | HCl<br>(mL) | Time<br>(mins) | Observation |
|----------------------|-------------------|-------------|----------------|-------------|
| <b>3</b>             | 20                | 0.05        | 5              | Yellow gel  |
| <b>3</b>             | 20                | 0.1         | 5              | Yellow gel  |
| <b>3</b>             | 20                | 0.05        | 1230           | Yellow gel  |
| <b>3</b>             | 20                | 0.1         | 1230           | Yellow gel  |

**Table S15:** Conc. HCl addition to a warmed solution of compound **4** in pyridine (1 mL). Time (T=0) is considered to be the point at which the HCl is added to the warmed pyridine/gelator solution.

| Compound/<br>Gelator | Amount<br>(mg/mL) | HCl<br>(mL) | Time<br>(mins) | Observation |
|----------------------|-------------------|-------------|----------------|-------------|
| <b>4</b>             | 20                | 0.05        | 5              | Yellow gel  |
| <b>4</b>             | 20                | 0.1         | 5              | Yellow gel  |
| <b>4</b>             | 20                | 0.05        | 1040           | Yellow gel  |
| <b>4</b>             | 20                | 0.1         | 1040           | Yellow gel  |

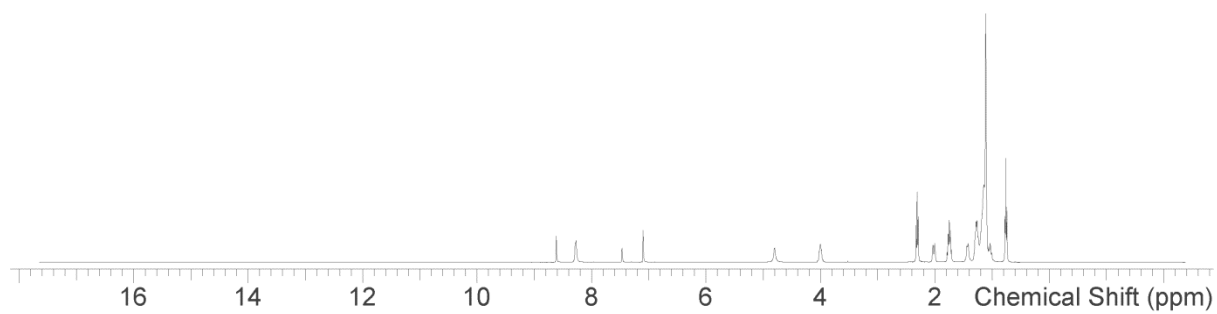

**Figure S5**  $^1\text{H}$  NMR spectrum compound **3** (25 mg/mL) in pyridine- $d_5$ .

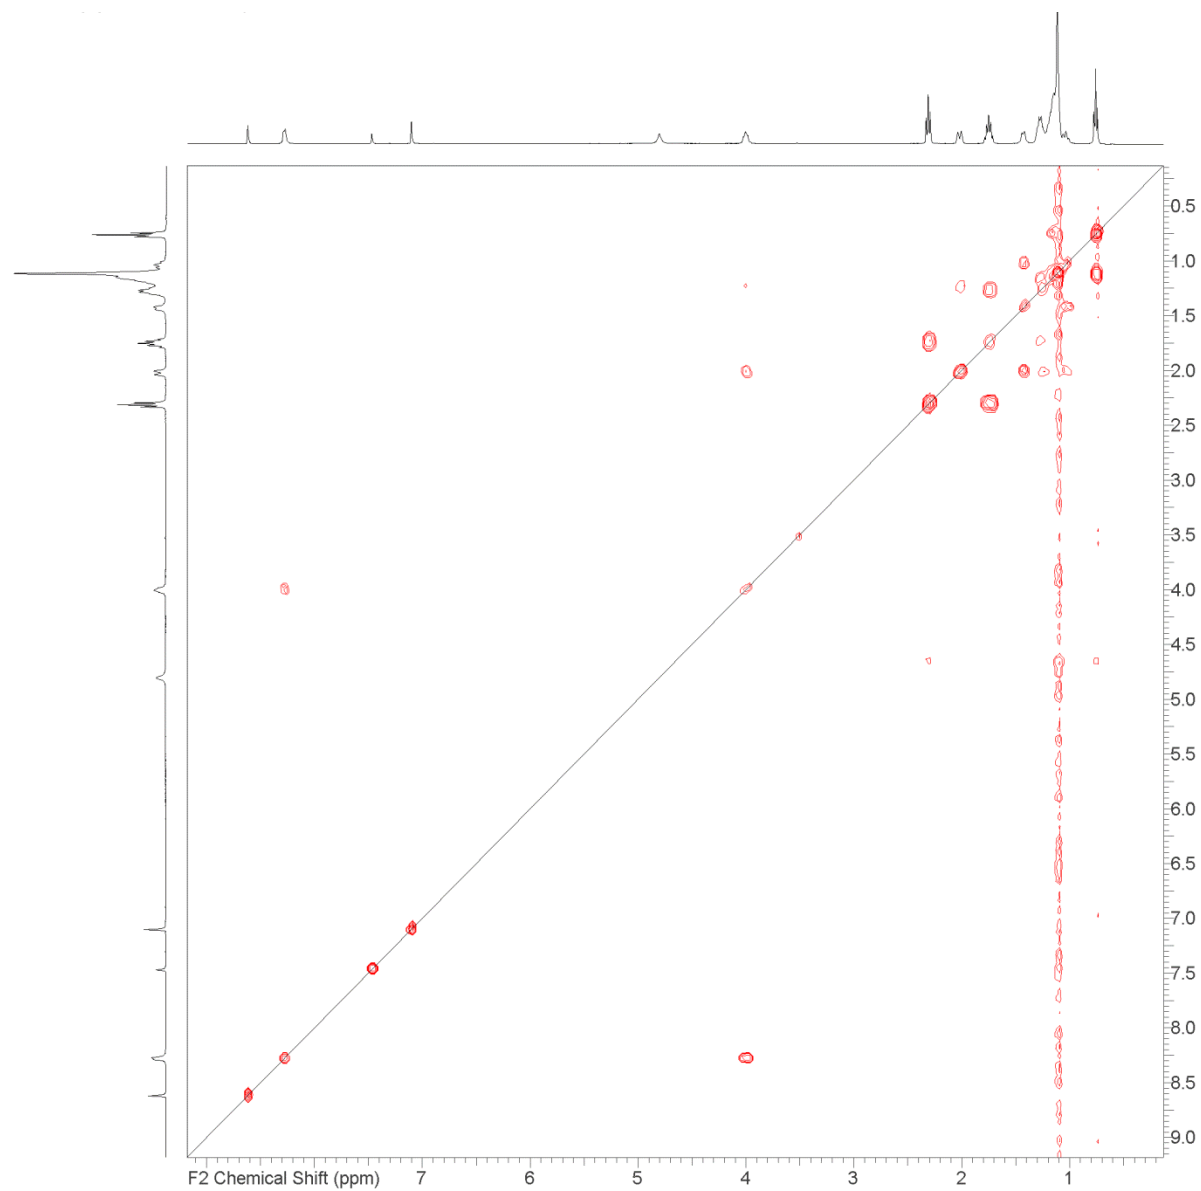

**Figure S6**  $^1\text{H}$  COSY NMR spectrum compound **3** (25 mg/mL) in pyridine- $d_5$ .

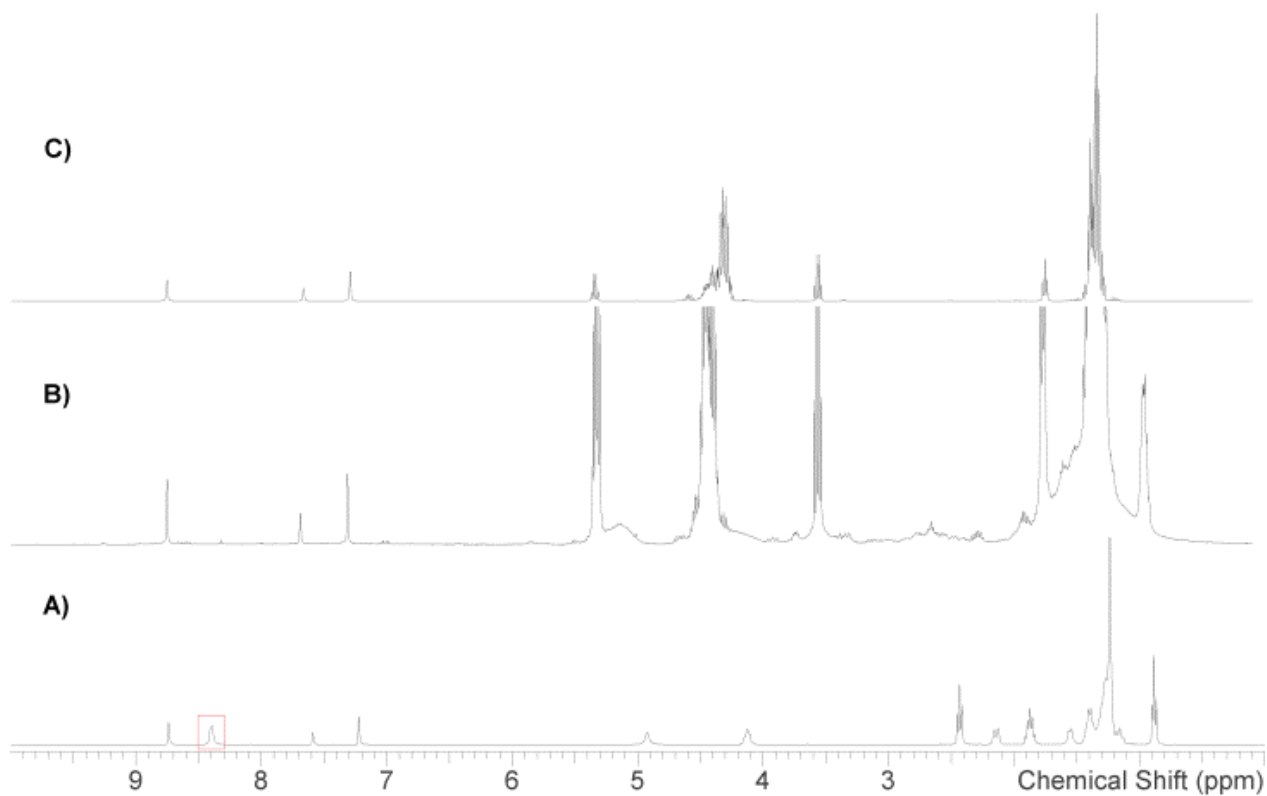

**Figure S7**  $^1\text{H}$  NMR spectra in pyridine- $d_5$  (1 mL) A) with compound **3** (25 mg/mL) the amide NH signal has been highlighted, B) same sample as A reacted with DCP (0.1 mL), C) with DCP only (0.1 mL).

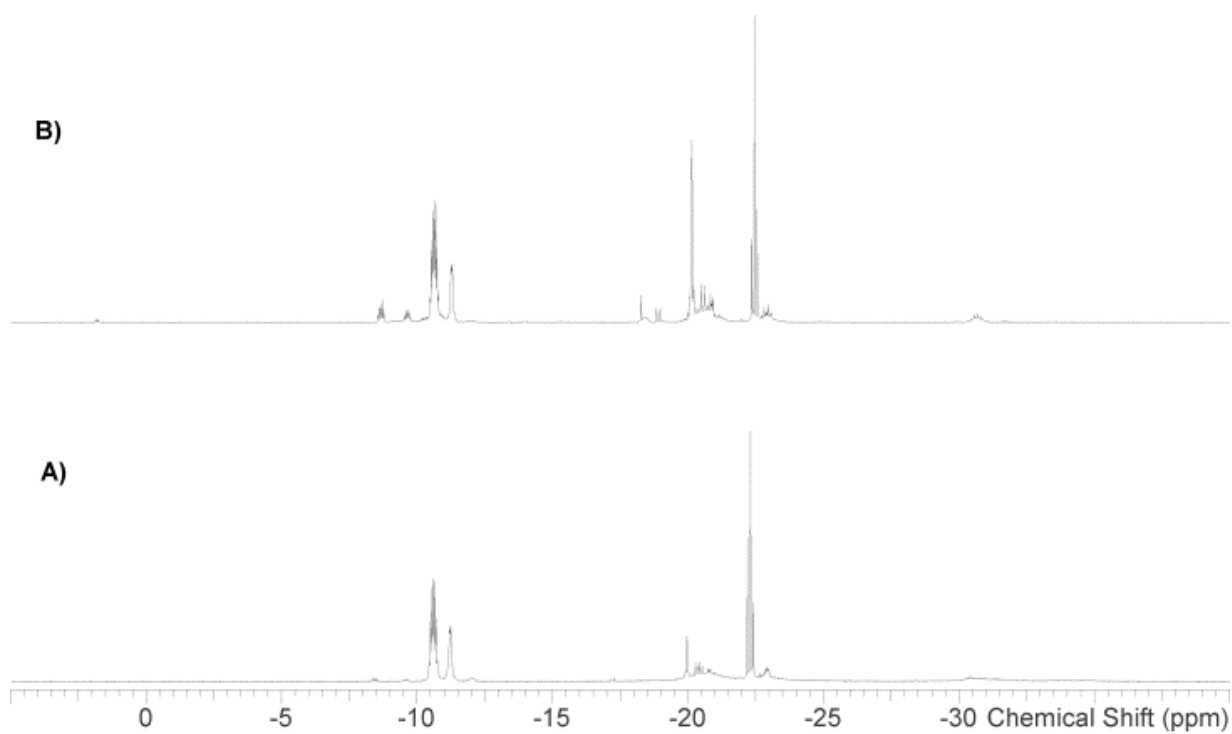

**Figure S8**  $^{31}\text{P}$  NMR spectra in pyridine- $d_5$  (1 mL) A) with DCP only (0.1 mL) B) with compound **3** (25 mg/mL) reacted with DCP (0.1 mL).

Chemistry - maXis HPLC-ESI Accurate Mass Report

**Analysis Info**  
 Analysis Name D:\Data\Chemistry\2014\Feb14\JH 7191 + DCP diluted\_BC7\_01\_10532.d Acquisition Date 07/02/2014 17:30:16  
 Method soton lcms pos 120 to 1500.m Operator MSWEB@SOTON.AC.UK  
 Sample Name JH 7191 + DCP diluted Instrument / Ser# maXis 17  
 Comment Analyst: JMH

**Acquisition Parameter**  
 Source Type ESI Ion Polarity Positive Set Nebulizer 2.0 Bar  
 Focus Not active Set Capillary 4000 V Set Dry Heater 200 °C  
 Scan Begin 120 m/z Set End Plate Offset -500 V Set Dry Gas 8.0 l/min  
 Scan End 1500 m/z Set Collision Cell RF 300.0 Vpp Set Divert Valve Waste

**+MS, 4.5-4.6min #(271-274)**

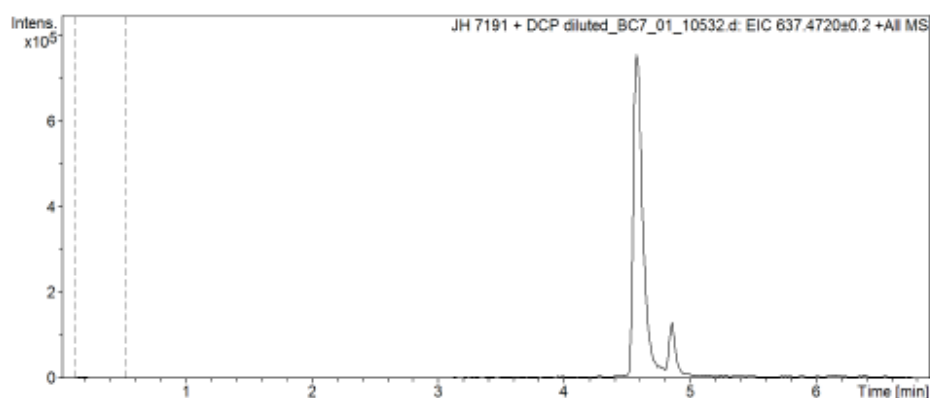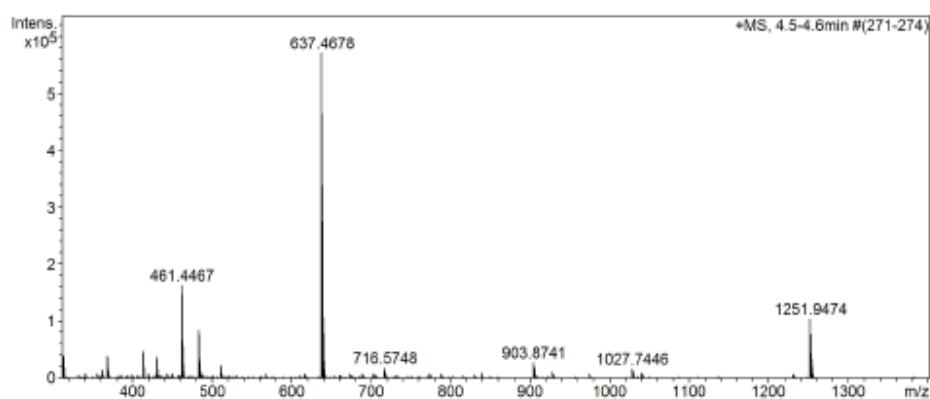

Chemistry - maXis HPLC-ESI Accurate Mass Report

| Meas. m/z | Formula                | m/z      | err [ppm] | err [mDa] | # Sigma | mSigma | rdb  | e <sup>-</sup> Conf | N-Rule |
|-----------|------------------------|----------|-----------|-----------|---------|--------|------|---------------------|--------|
| 637.4678  | C 37 H 58 N 8 Na       | 637.4677 | -0.2      | -0.2      | 1       | 86.6   | 12.5 | even                | ok     |
|           | C 38 H 61 N 4 O 4      | 637.4687 | 1.4       | 0.9       | 2       | 86.7   | 10.5 | even                | ok     |
|           | C 37 H 65 O 8          | 637.4674 | -0.7      | -0.4      | 3       | 98.7   | 5.5  | even                | ok     |
|           | C 34 H 67 N 2 Na O 5 P | 637.4680 | 0.2       | 0.2       | 4       | 113.3  | 2.5  | even                | ok     |
|           | C 32 H 62 N 8 O 3 P    | 637.4677 | -0.2      | -0.1      | 5       | 114.2  | 6.5  | even                | ok     |
|           | C 22 H 54 N 20 Na O    | 637.4682 | 0.5       | 0.3       | 6       | 172.8  | 5.5  | even                | ok     |
|           | C 21 H 58 N 16 Na O 5  | 637.4668 | -1.6      | -1.0      | 7       | 185.4  | 0.5  | even                | ok     |
|           | C 19 H 53 N 22 O 3     | 637.4666 | -2.0      | -1.3      | 8       | 186.6  | 4.5  | even                | ok     |

Samples were analysed using a MaXis (Bruker Daltonics, Bremen, Germany) mass spectrometer equipped with a Time of Flight (TOF) analyser. Samples were introduced to the mass spectrometer via a Dionex Ultimate 3000 autosampler and uHPLC pump. Gradient 20% acetonitrile (0.1% formic acid) to 100% acetonitrile (0.1% formic acid) in five minutes. Column, Acquity UPLC BEH C18 (Waters) 1.7 micron 50 x 2.1mm. High resolution mass spectra were recorded using positive/negative ion electrospray ionisation.

**Figure S9** HRMS of compound **5** obtained from a reaction mixture of compound **3** (10 mg), DCP (0.1 mL) in Pyridine (1 mL).

## Chemistry - maXis ESI Accurate Mass Report

|                      |                                                                   |                   |                     |  |
|----------------------|-------------------------------------------------------------------|-------------------|---------------------|--|
| <b>Analysis Info</b> |                                                                   | Acquisition Date  | 07/02/2014 17:30:16 |  |
| Analysis Name        | D:\Data\Chemistry\2014\Feb14\JH 7191 + DCP diluted_BC7_01_10532.d | Operator          | MSWEB@SOTON.AC.UK   |  |
| Method               | soton lcms pos 120 to 1500.m                                      | Instrument / Ser# | maXis 17            |  |
| Sample Name          | JH 7191 + DCP diluted                                             |                   |                     |  |
| Comment              | Analyst: JMH                                                      |                   |                     |  |

## Acquisition Parameter

|             |            |                       |           |                  |           |
|-------------|------------|-----------------------|-----------|------------------|-----------|
| Source Type | ESI        | Ion Polarity          | Positive  | Set Nebulizer    | 2.0 Bar   |
| Focus       | Not active | Set Capillary         | 4000 V    | Set Dry Heater   | 200 °C    |
| Scan Begin  | 120 m/z    | Set End Plate Offset  | -500 V    | Set Dry Gas      | 8.0 l/min |
| Scan End    | 1500 m/z   | Set Collision Cell RF | 300.0 Vpp | Set Divert Valve | Waste     |

## +MS, 3.0-3.0min #(179-182)

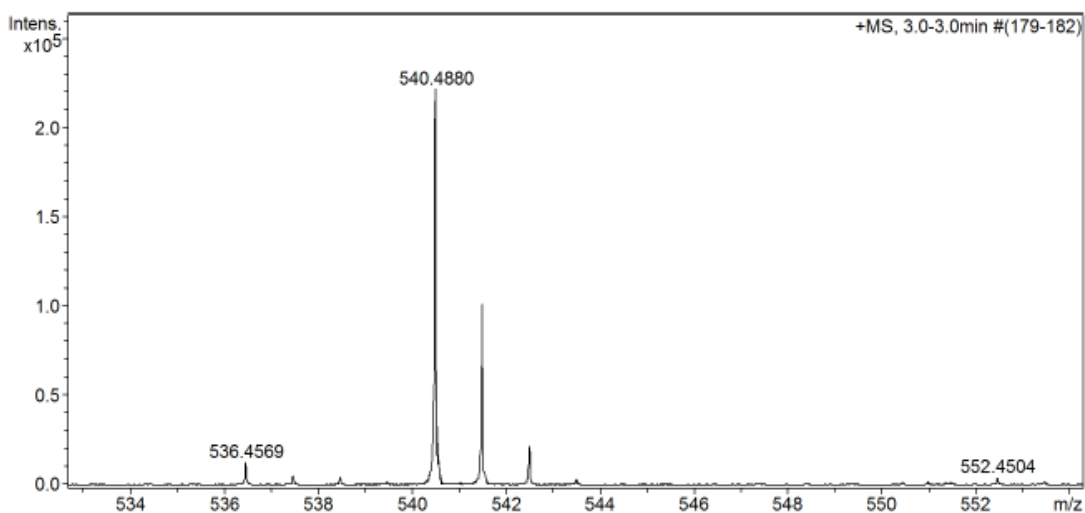

| Meas. m/z | Formula         | m/z      | err [ppm] | err [mDa] | # Sigma | mSigma | rdb | e <sup>-</sup> Conf | N-Rule |
|-----------|-----------------|----------|-----------|-----------|---------|--------|-----|---------------------|--------|
| 540.4880  | C 35 H 62 N 3 O | 540.4887 | 1.4       | 0.8       | 1       | 32.1   | 6.5 | even                | ok     |

## Chemistry - maXis ESI Accurate Mass Report

Samples were analysed using a MaXis (Bruker Daltonics, Bremen, Germany) mass spectrometer equipped with a Time of Flight (TOF) analyser. High resolution mass spectra were recorded using positive/negative ion electrospray ionisation.

**Figure S10** HRMS of compound **6** obtained from a reaction mixture of compound **3** (10 mg), DCP (0.1 mL) in Pyridine (1 mL).

Chemistry - maXis ESI Accurate Mass Report

**Analysis Info**  
 Analysis Name D:\Data\Chemistry\2014\Feb14\JH 7191 + DCP diluted\_BC7\_01\_10532.d Acquisition Date 07/02/2014 17:30:16  
 Method soton lcms pos 120 to 1500.m Operator MSWEB@SOTON.AC.UK  
 Sample Name JH 7191 + DCP diluted Instrument / Ser# maXis 17  
 Comment Analyst: JMH

**Acquisition Parameter**

|             |            |                       |           |                  |           |
|-------------|------------|-----------------------|-----------|------------------|-----------|
| Source Type | ESI        | Ion Polarity          | Positive  | Set Nebulizer    | 2.0 Bar   |
| Focus       | Not active | Set Capillary         | 4000 V    | Set Dry Heater   | 200 °C    |
| Scan Begin  | 120 m/z    | Set End Plate Offset  | -500 V    | Set Dry Gas      | 8.0 l/min |
| Scan End    | 1500 m/z   | Set Collision Cell RF | 300.0 Vpp | Set Divert Valve | Waste     |

+MS, 3.0-3.0min #(178-182)

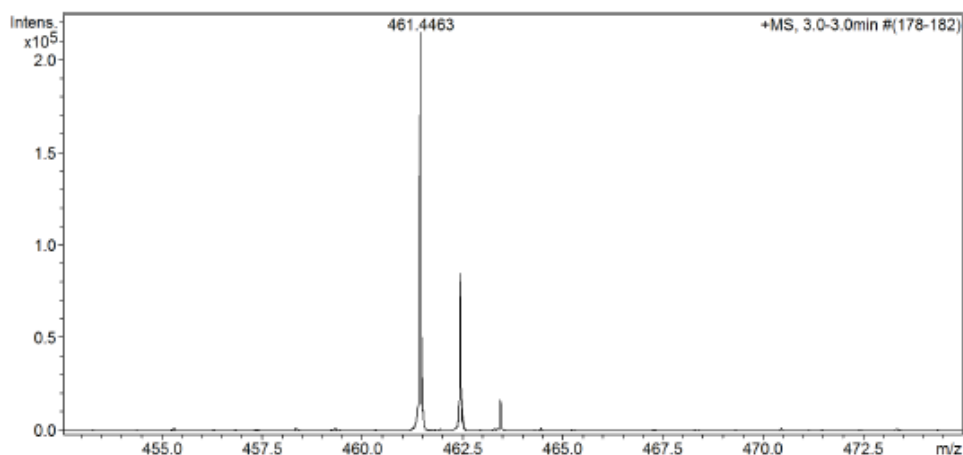

| Meas. m/z | Formula            | m/z      | err [ppm] | err [mDa] | # Sigma | mSigma | rdb | e <sup>-</sup> Conf | N-Rule |
|-----------|--------------------|----------|-----------|-----------|---------|--------|-----|---------------------|--------|
| 461.4463  | C 30 H 57 N 2 O    | 461.4465 | 0.5       | 0.2       | 1       | 30.5   | 3.5 | even                | ok     |
|           | C 28 H 58 N 2 Na O | 461.4441 | -4.7      | -2.2      | 2       | 41.9   | 0.5 | even                | ok     |

Chemistry - maXis ESI Accurate Mass Report

Samples were analysed using a MaXis (Bruker Daltonics, Bremen, Germany) mass spectrometer equipped with a Time of Flight (TOF) analyser. High resolution mass spectra were recorded using positive/negative ion electrospray ionisation.

Figure S11 HRMS of compound 7 obtained from a reaction mixture of compound 3 (10 mg), DCP (0.1 mL) in Pyridine (1 mL).



## Chemistry - maXis ESI Accurate Mass Report

### Analysis Info

Analysis Name D:\Data\Chemistry\2014\Feb14\JH 7191 + DCP diluted\_BC7\_01\_10532.d  
 Method soton lcms pos 120 to 1500.m  
 Sample Name JH 7191 + DCP diluted  
 Comment Analyst: JMH

Acquisition Date 07/02/2014 17:30:16

Operator MSWEB@SOTON.AC.UK

Instrument / Ser# maXis 17

### Acquisition Parameter

|             |            |                       |           |                  |           |
|-------------|------------|-----------------------|-----------|------------------|-----------|
| Source Type | ESI        | Ion Polarity          | Positive  | Set Nebulizer    | 2.0 Bar   |
| Focus       | Not active | Set Capillary         | 4000 V    | Set Dry Heater   | 200 °C    |
| Scan Begin  | 120 m/z    | Set End Plate Offset  | -500 V    | Set Dry Gas      | 8.0 l/min |
| Scan End    | 1500 m/z   | Set Collision Cell RF | 300.0 Vpp | Set Divert Valve | Waste     |

### +MS, 4.6-4.6min #(272-275)

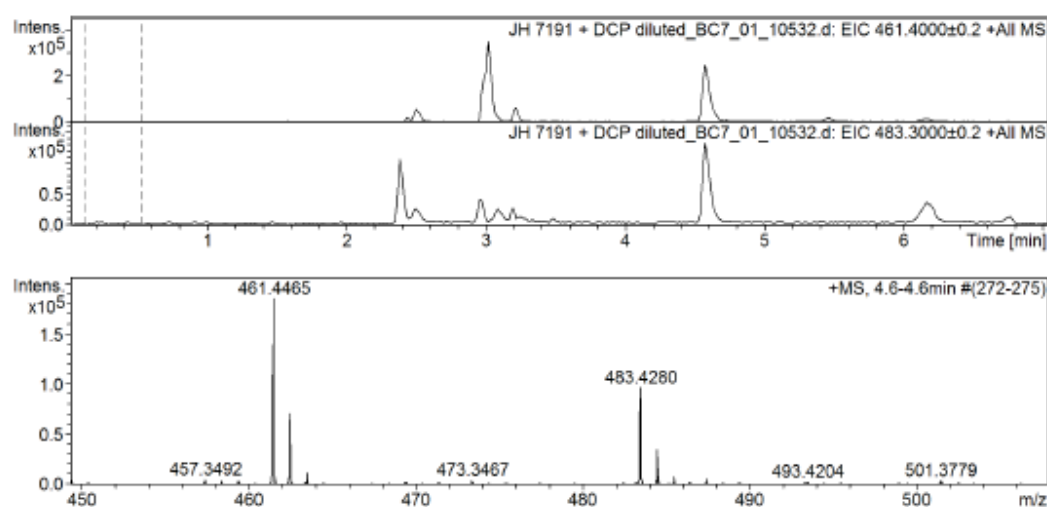

| Meas. m/z | Formula                                                       | m/z      | err [ppm] | err [mDa] | # Sigma | mSigma | rdb | e <sup>-</sup> Conf | N-Rule |
|-----------|---------------------------------------------------------------|----------|-----------|-----------|---------|--------|-----|---------------------|--------|
| 461.4465  | C <sub>30</sub> H <sub>57</sub> N <sub>2</sub> O              | 461.4465 | 0.1       | 0.0       | 1       | 23.7   | 3.5 | even                | ok     |
|           | C <sub>28</sub> H <sub>58</sub> N <sub>2</sub> NaO            | 461.4441 | -5.1      | -2.4      | 2       | 35.0   | 0.5 | even                | ok     |
| 483.4280  | C <sub>32</sub> H <sub>55</sub> N <sub>2</sub> O              | 483.4309 | 6.0       | 2.9       | 1       | 7.0    | 6.5 | even                | ok     |
|           | C <sub>30</sub> H <sub>56</sub> N <sub>2</sub> NaO            | 483.4285 | 1.0       | 0.5       | 2       | 16.4   | 3.5 | even                | ok     |
|           | C <sub>27</sub> H <sub>55</sub> N <sub>4</sub> O <sub>3</sub> | 483.4269 | -2.4      | -1.1      | 3       | 27.7   | 2.5 | even                | ok     |

## Chemistry - maXis ESI Accurate Mass Report

Samples were analysed using a MaXis (Bruker Daltonics, Bremen, Germany) mass spectrometer equipped with a Time of Flight (TOF) analyser. High resolution mass spectra were recorded using positive/negative ion electrospray ionisation.

**Figure S12** HRMS of compound **8** obtained from a reaction mixture of compound **3** (10 mg), DCP (0.1 mL) in Pyridine (1 mL).

Chemistry - maXis HPLC-ESI Accurate Mass Report

|                      |                                                                   |                   |                     |
|----------------------|-------------------------------------------------------------------|-------------------|---------------------|
| <b>Analysis Info</b> |                                                                   | Acquisition Date  | 07/02/2014 17:30:16 |
| Analysis Name        | D:\Data\Chemistry\2014\Feb14\JH 7191 + DCP diluted_BC7_01_10532.d | Operator          | MSWEB@SOTON.AC.UK   |
| Method               | soton lcms pos 120 to 1500.m                                      | Instrument / Ser# | maXis 17            |
| Sample Name          | JH 7191 + DCP diluted                                             |                   |                     |
| Comment              | Analyst: JMH                                                      |                   |                     |

|                              |            |                       |           |                  |           |
|------------------------------|------------|-----------------------|-----------|------------------|-----------|
| <b>Acquisition Parameter</b> |            |                       |           |                  |           |
| Source Type                  | ESI        | Ion Polarity          | Positive  | Set Nebulizer    | 2.0 Bar   |
| Focus                        | Not active | Set Capillary         | 4000 V    | Set Dry Heater   | 200 °C    |
| Scan Begin                   | 120 m/z    | Set End Plate Offset  | -500 V    | Set Dry Gas      | 8.0 l/min |
| Scan End                     | 1500 m/z   | Set Collision Cell RF | 300.0 Vpp | Set Divert Valve | Waste     |

+MS, 2.3-2.3min #(137-140)

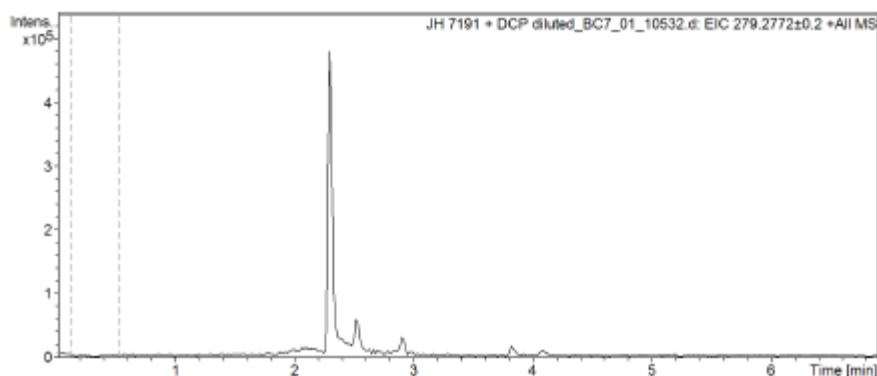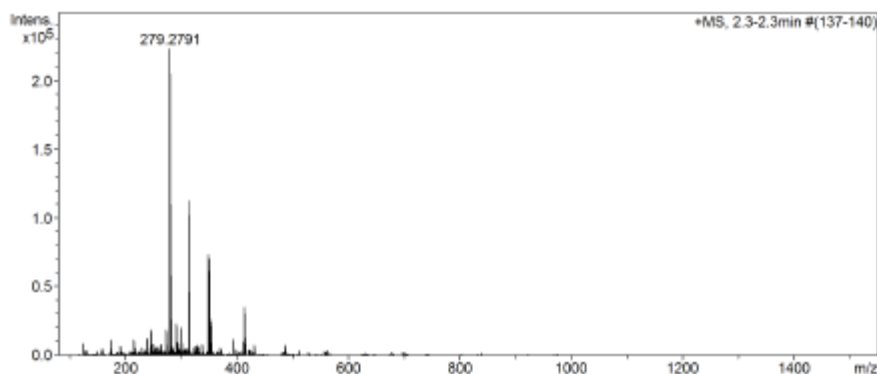

Chemistry - maXis HPLC-ESI Accurate Mass Report

| Meas. m/z | Formula       | m/z      | err [ppm] | err [mDa] | # Sigma | mSigma | rdb | e <sup>-</sup> Conf | N-Rule |
|-----------|---------------|----------|-----------|-----------|---------|--------|-----|---------------------|--------|
| 279.2791  | C 18 H 35 N 2 | 279.2795 | 1.2       | 0.3       | 1       | 47.0   | 2.5 | even                | ok     |

Samples were analysed using a MaXis (Bruker Daltonics, Bremen, Germany) mass spectrometer equipped with a Time of Flight (TOF) analyser. Samples were introduced to the mass spectrometer via a Dionex Ultimate 3000 autosampler and uHPLC pump. Gradient 20% acetonitrile (0.1% formic acid) to 100% acetonitrile (0.1% formic acid) in five minutes. Column, Acquity UPLC BEH C18 (Waters) 1.7 micron 50 x 2.1mm. High resolution mass spectra were recorded using positive/negative ion electrospray ionisation.

Figure S13 HRMS of compound 9 obtained from a reaction mixture of compound 3 (10 mg), DCP (0.1 mL) in Pyridine (1 mL).

**Table 2** High resolution mass spectrometry data obtained from the reaction of gelator **3** (10 mg/mL) and DCP (0.1 mg) in pyridine (1 mL).

| Ion                                        | Experimental value (m/z) | Calculated value (m/z) | Retention time (min.) |
|--------------------------------------------|--------------------------|------------------------|-----------------------|
| [ <b>5</b> + Na] <sup>+</sup>              | 637.4678                 | 637.4680               | 4.5-4.6               |
| [ <b>6</b> ] <sup>+</sup>                  | 540.4880                 | 540.4887               | 3.0                   |
| [ <b>7</b> ] <sup>+</sup>                  | 461.4463                 | 461.4465               | 3.0                   |
| [ <b>8</b> + H] <sup>+</sup>               | 461.4465                 | 461.4465               | 4.6                   |
| [ <b>8</b> + Na] <sup>+</sup>              | 483.4280                 | 483.4285               | 4.6                   |
| [ <b>9a</b> <sup>a</sup> + H] <sup>+</sup> | 279.2791                 | 279.2795               | 2.3                   |

<sup>a</sup> – compound **9a** is to be taken as the neutral form of compound **9**.

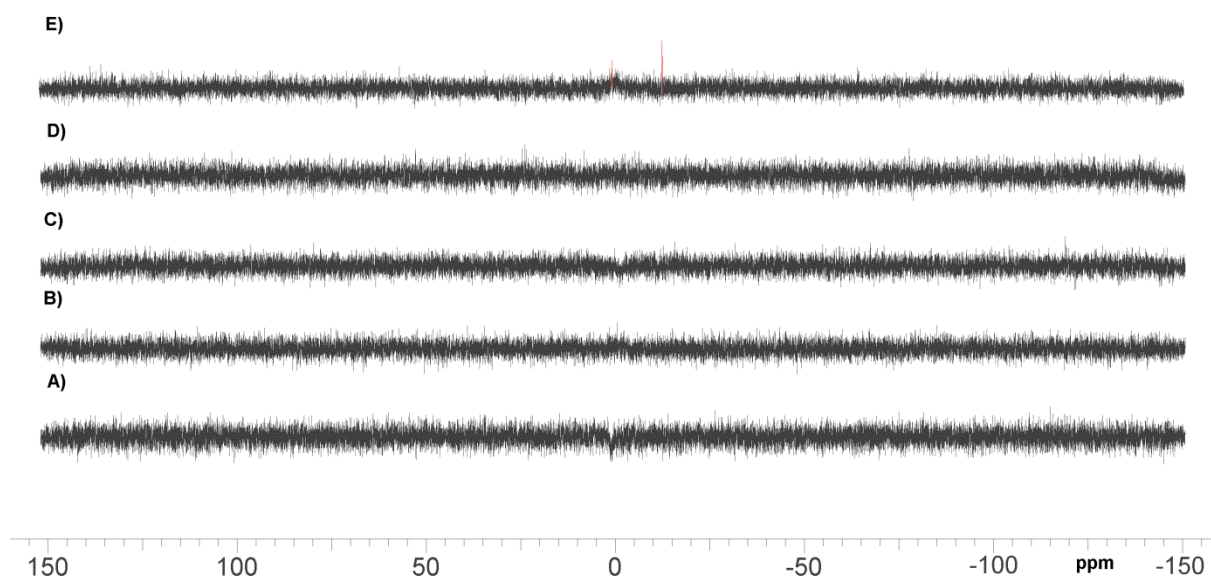

**Figure S14a** <sup>31</sup>P NMR of five coloured fractions isolated by preparative TLC from the reaction of compound **3** (20 mg), pyridine (1 mL) and DCP (0.1 mL) in a mixture of CDCl<sub>3</sub>:DMSO-*d*<sub>6</sub> 9:1. The phosphorus signals are highlighted in red.

TIC, NL 8.518E07, MS2 (150:1500) ES+

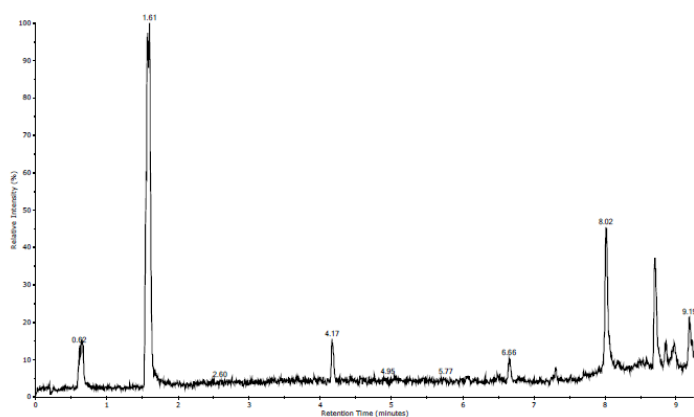

|   | RT Mins | Height   | Height % | Area      | Area % |
|---|---------|----------|----------|-----------|--------|
| 1 | 1.58    | 7991246  | 10.14    | 4842489   | 4.56   |
| 2 | 1.61    | 78783206 | 100.00   | 106279002 | 100.00 |
| 3 | 4.17    | 9962302  | 12.65    | 15884584  | 14.95  |
| 4 | 6.66    | 4592669  | 5.83     | 5113631   | 4.81   |
| 5 | 8.02    | 31019375 | 39.37    | 34165145  | 32.15  |
| 6 | 8.70    | 22711975 | 28.83    | 63579695  | 59.82  |
| 7 | 9.19    | 8443399  | 10.72    | 22656482  | 21.32  |
| 8 | 9.22    | 4167935  | 5.29     | 4246435   | 4.00   |

Peak 2, RT 1.605, Scan 602, NL 4.017E07, MS2 (150:1500) ES+

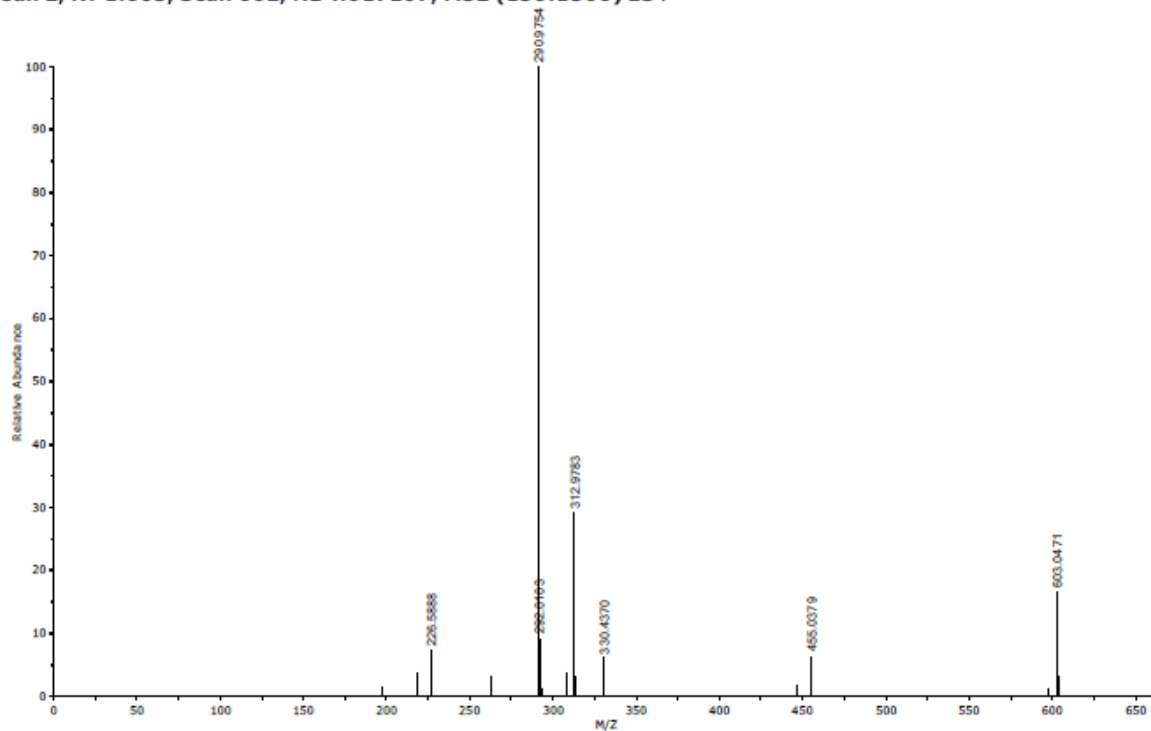

**Figure S14b** LRMS of fraction diethylphosphate isolated by preparative TLC (fraction E) from the reaction of compound **3** (20 mg), pyridine (1 mL) and DCP (0.1 mL).

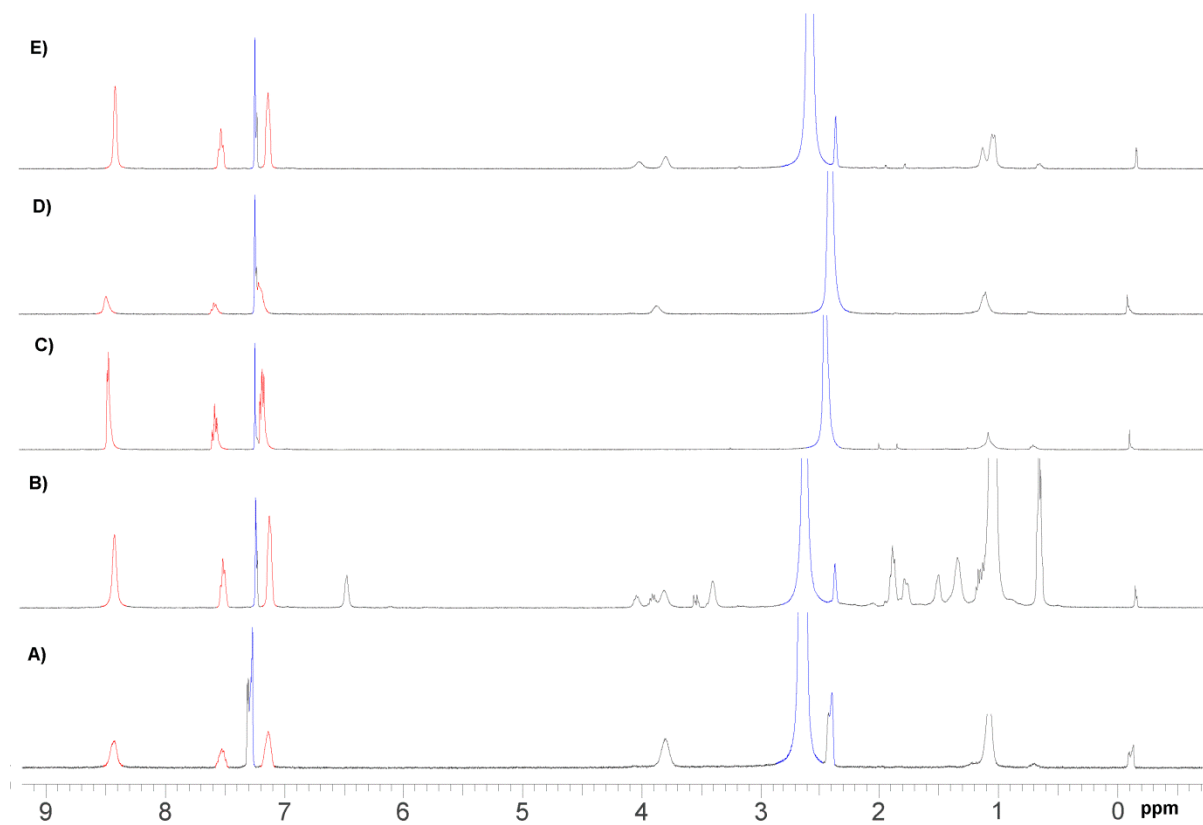

**Figure S14c** <sup>1</sup>H NMR of five coloured fractions isolated by preparative TLC from the reaction of compound **3** (20 mg), pyridine (1 mL) and DCP (0.1 mL) in a mixture of CDCl<sub>3</sub>:DMSO-*d*<sub>6</sub> 9:1. The pyridyl signals are highlighted in red and the solvent signals are highlighted in blue.

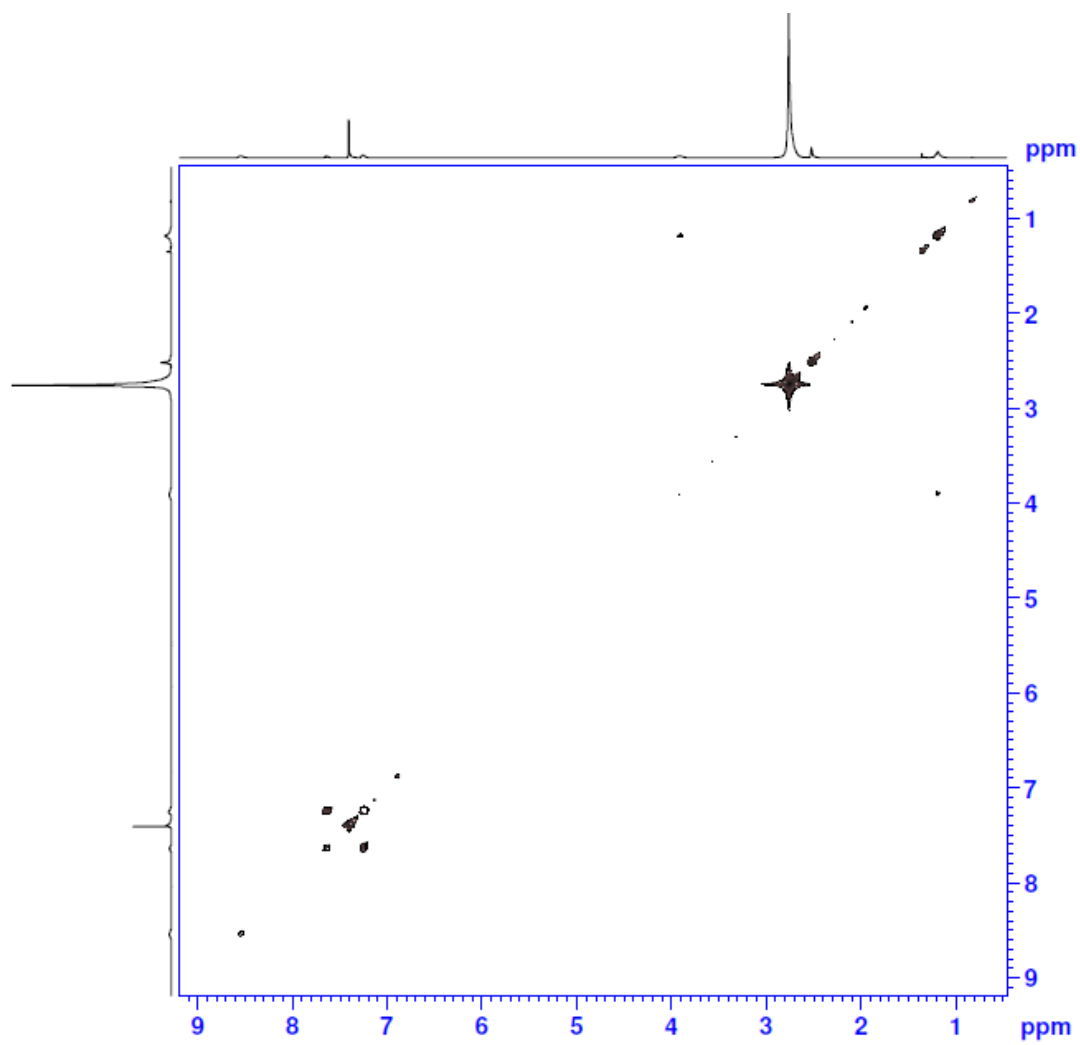

**Figure S15a** COSY of fraction A as described in Figure 14a.

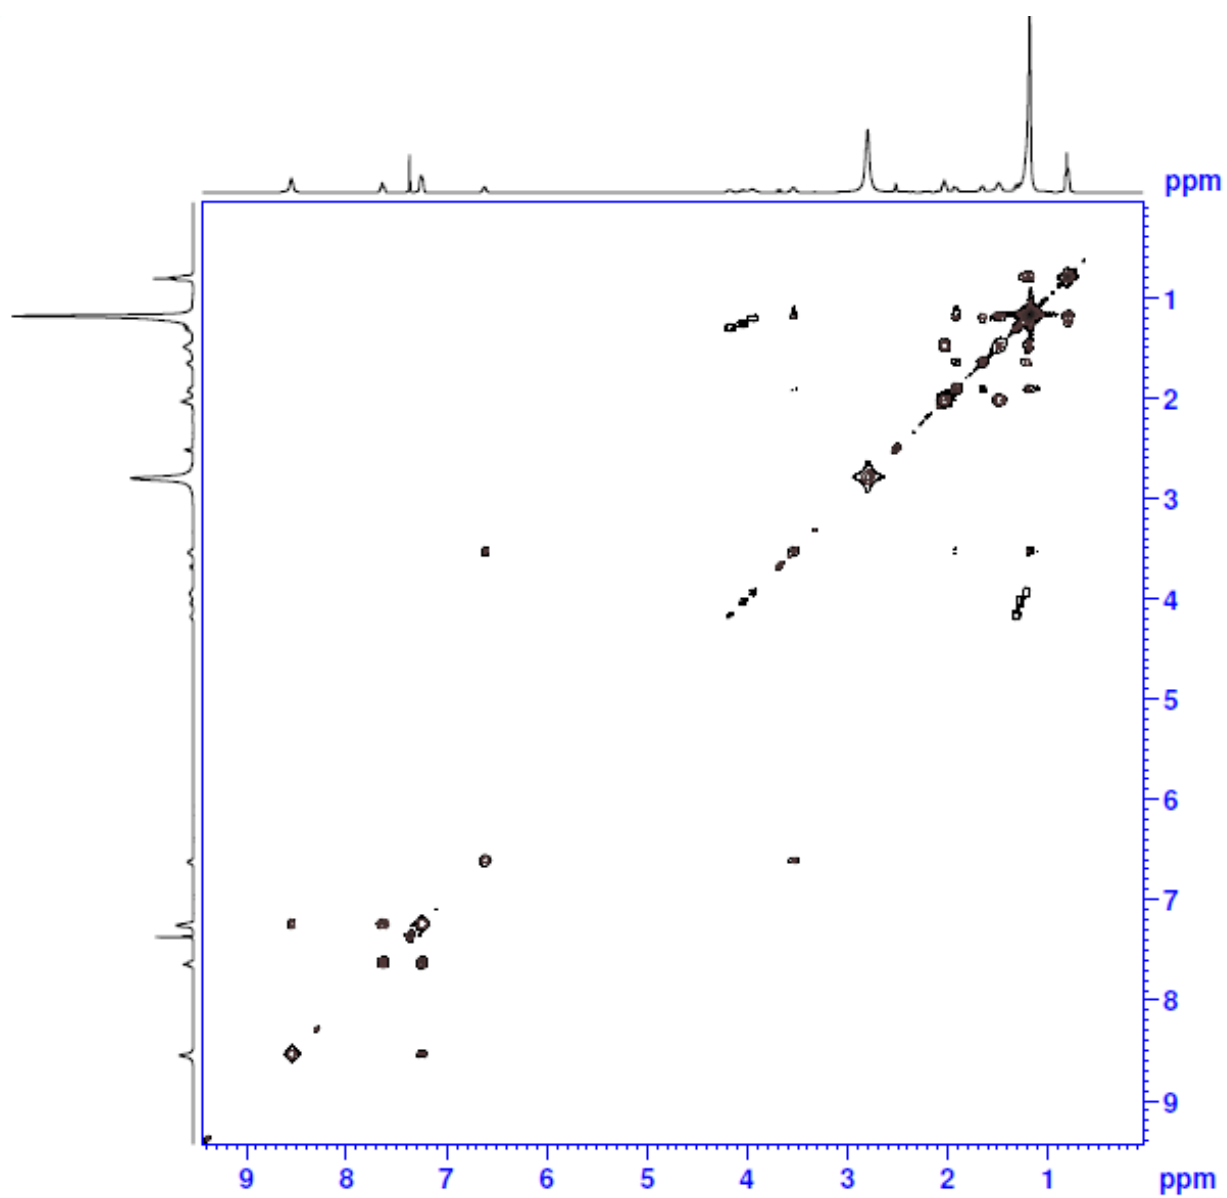

**Figure S15b** COSY of fraction B as described in Figure 14a.

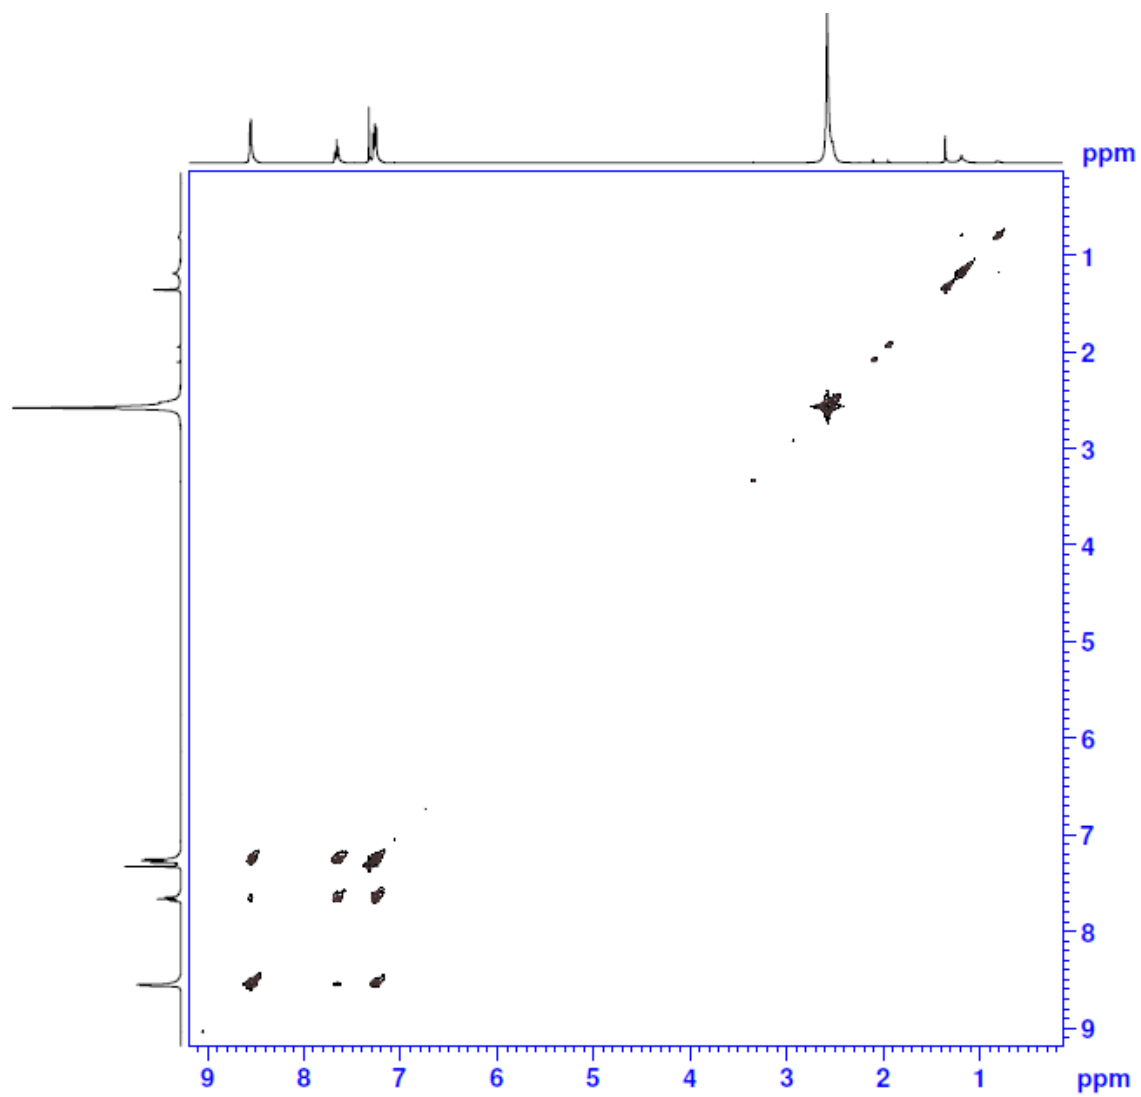

**Figure S15c** COSY of fraction C as described in Figure 14a.



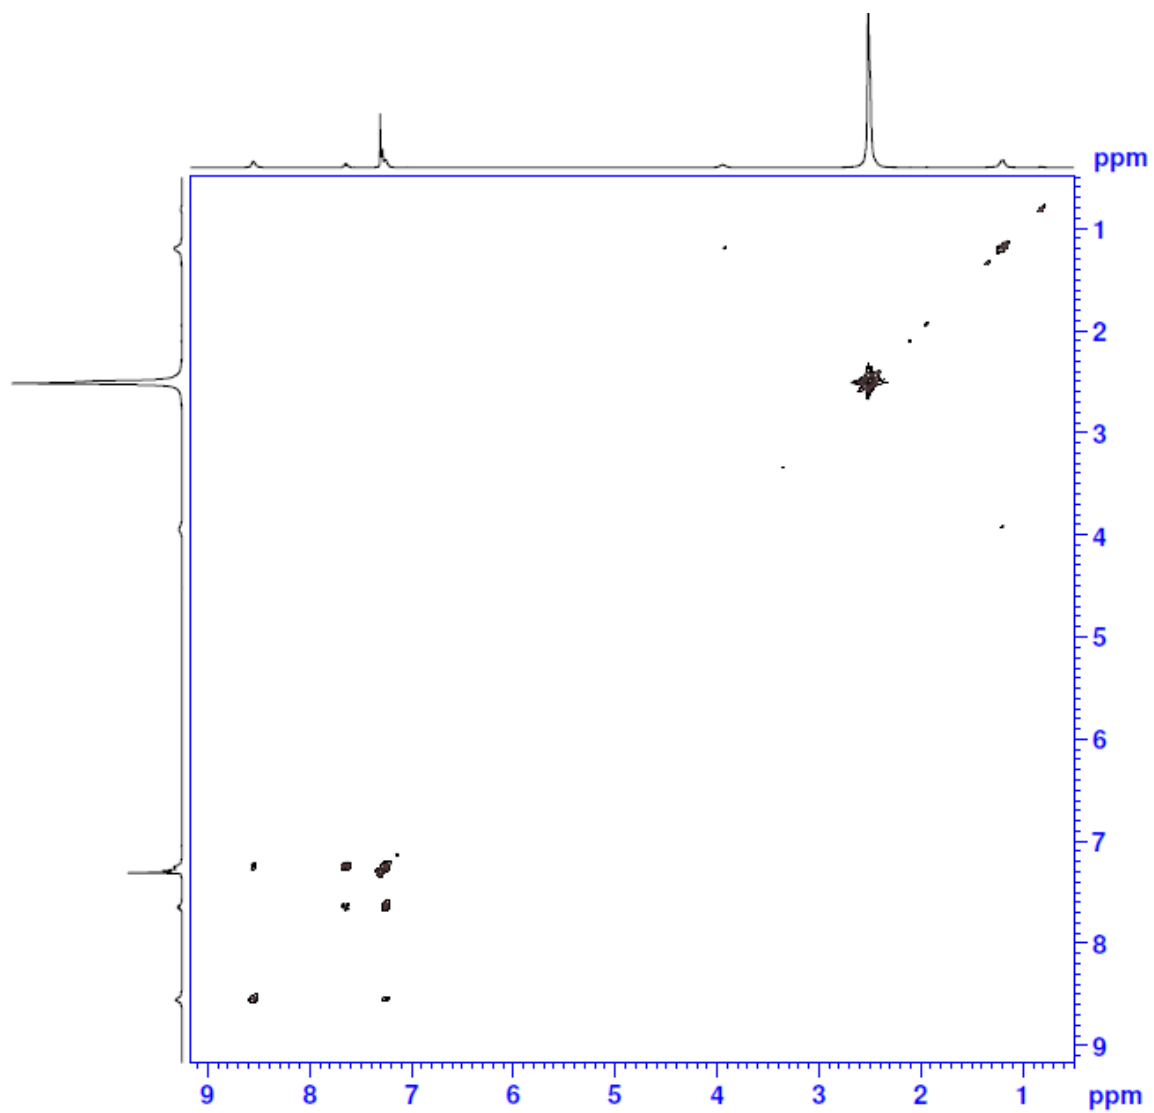

**Figure S15d** COSY of fraction D as described in Figure 14a.

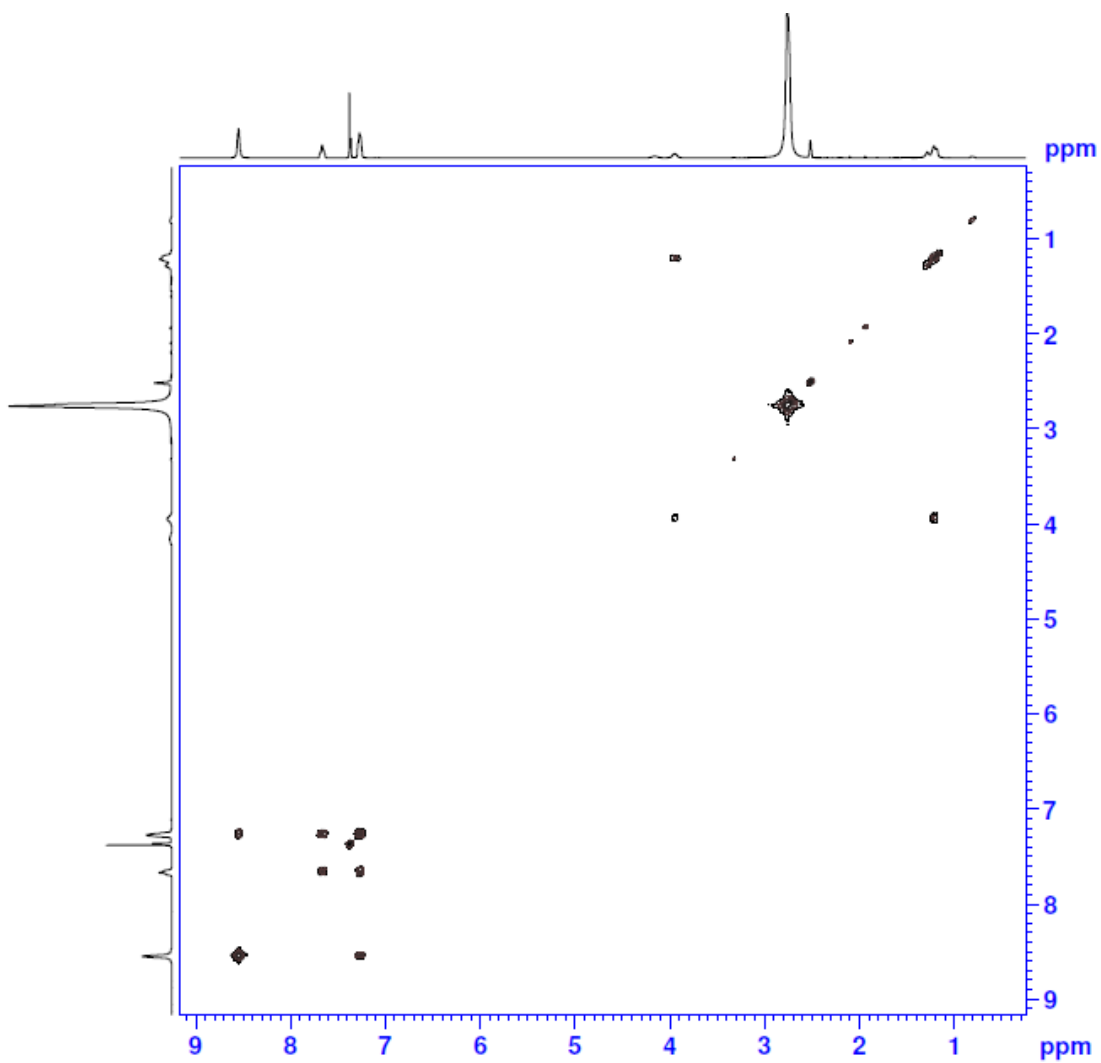

Figure S15e COSY of fraction E as described in Figure 14a.

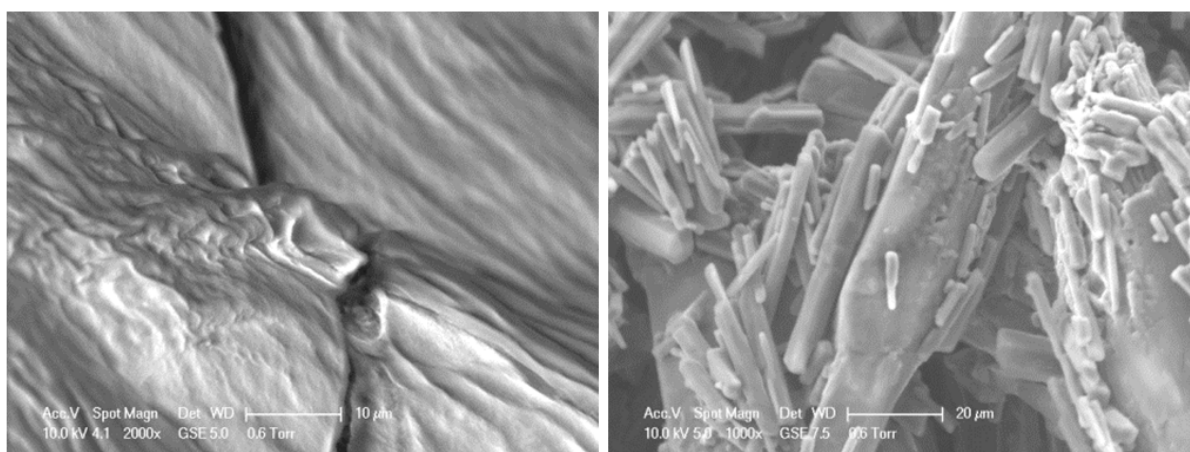

Figure S16 Enlargement of Figure 1 giving experimental details of individual experiments.

## References

1. H. Sato, T. Nakae, K. Morimoto and K. Tamura, *Org. Biomol. Chem.*, 2012, **10**, 1581-1586.
2. N. Zweep, A. Hopkinson, A. Meetsma, W. R. Browne, B. L. Feringa and J. H. van Esch, *Langmuir*, 2009, **25**, 8802-8809.
3. M. Kimura, T. Kitamura, T. Muto, K. Hanabusa, H. Shirai and N. Kobayashi, *Chem. Lett.*, 2000, 1088-1089.
